1  
2  
3  
4  
5  
6  
7  
8  
9  
10  
11  
12  
13  
14  
15  
16  
17  
18  
19  
20  
21  
22  
23  
24  
25  
26

**Didemnin B and ternatin-4 inhibit conformational changes in eEF1A required for aminoacyl-tRNA accommodation into mammalian ribosomes**

Manuel F. Juetter<sup>1,†</sup>, Jordan D. Carelli<sup>2,†</sup>, Emily J. Rundlet<sup>1,3,4,†</sup>, Alan Brown<sup>5,6</sup>, Sichen Shao<sup>5,7</sup>,  
Angelica Ferguson<sup>1</sup>, Michael R. Wasserman<sup>1</sup>, Mikael Holm<sup>1,3</sup>, Jack Taunton<sup>2,\*</sup>,  
and Scott C. Blanchard<sup>1,3,\*</sup>

<sup>1</sup> Department of Physiology and Biophysics, Weill Cornell Medicine, New York, NY, USA

<sup>2</sup> Chemistry and Chemical Biology Graduate Program and Department of Cellular and Molecular Pharmacology, University of California, San Francisco, San Francisco, CA, USA

<sup>3</sup> Department of Structural Biology, St. Jude Children's Research Hospital, Memphis, TN, USA

<sup>4</sup> Tri-Institutional PhD Program in Chemical Biology, Weill Cornell Medicine, New York, NY, USA

<sup>5</sup> MRC-LMB, Francis Crick Avenue, Cambridge, UK

<sup>6</sup> Present address: Department of Biological Chemistry and Molecular Pharmacology, Blavatnik Institute, Harvard Medical School, Boston, MA, USA

<sup>7</sup> Present address: Department of Cell Biology, Blavatnik Institute, Harvard Medical School, Boston, MA, USA

<sup>†</sup>These authors contributed equally.

\*Corresponding authors: [Jack.Taunton@ucsf.edu](mailto:Jack.Taunton@ucsf.edu), [Scott.Blanchard@stjude.org](mailto:Scott.Blanchard@stjude.org)

27 **Abstract**

28 Rapid and accurate mRNA translation requires efficient codon-dependent delivery of the correct  
29 aminoacyl-tRNA (aa-tRNA) to the ribosomal A site. In mammals, this fidelity-determining  
30 reaction is facilitated by the GTPase elongation factor-1 alpha (eEF1A), which escorts aa-tRNA  
31 as an eEF1A(GTP)-aa-tRNA ternary complex into the ribosome. Two structurally unrelated  
32 cyclic peptides didemnin B and ternatin-4 bind to the eEF1A(GTP)-aa-tRNA ternary complex  
33 and inhibit translation. Here, we employ single-molecule fluorescence imaging and cryogenic  
34 electron microscopy to determine how these natural products inhibit translational elongation on  
35 mammalian ribosomes. By binding to a common allosteric site on eEF1A, didemnin B and  
36 ternatin-4 trap eEF1A in its GTPase-activated conformation, preventing aa-tRNA  
37 accommodation on the ribosome. We also show that didemnin B and ternatin-4 exhibit distinct  
38 effects on aa-tRNA selection that inform on observed disparities in their inhibition efficacies and  
39 physiological impacts. These integrated findings highlight the potential of single-molecule  
40 methods to reveal how distinct natural products differentially impact the human translation  
41 mechanism.

## 42 **Introduction**

43 Translation of the genetic code from mRNA into protein is a multi-step process catalyzed by the  
44 two-subunit ribosome (80S in eukaryotes) in coordination with translational GTPases  
45 (Behrmann et al., 2015). Each translation step is regulated by signaling pathways linked to cell  
46 growth, differentiation, nutrient sensing, and homeostatic quality control. Protein synthesis  
47 status is thus a central hub for sensing cellular stress. Dysregulated protein synthesis plays a  
48 role in several human diseases and is a therapeutic vulnerability in cancer and viral infection  
49 (Bhat et al., 2015; Hoang et al., 2021; Xu and Ruggero, 2020).

50 The elongation cycle in eukaryotic protein synthesis begins with the binding of a ternary  
51 complex of the highly conserved, three-domain (DI-III) eukaryotic elongation factor-1 alpha  
52 (eEF1A), GTP, and aminoacyl-tRNA (aa-tRNA) to the Aminoacyl (A) site at the leading edge of  
53 the 80S ribosome (Abbas et al., 2015). Base-pairing interactions within the small subunit (SSU)  
54 between the A-site mRNA codon and a cognate aa-tRNA anticodon trigger a sequence of  
55 structural rearrangements that dock eEF1A at the large subunit (LSU) GTPase activating center  
56 (GAC). There, the GAC triggers eEF1A to hydrolyze GTP, ultimately driving eEF1A dissociation  
57 and accommodation of the aa-tRNA 3'-CCA end into the LSU peptidyl transferase center (PTC)  
58 (Budkevich et al., 2014; Ferguson et al., 2015; Voorhees et al., 2010). Once fully  
59 accommodated, aa-tRNA undergoes a peptide-bond forming, condensation reaction that  
60 extends the nascent polypeptide by one amino acid, generating a pre-translocation ribosome  
61 complex. Ensuing conformational processes within the ribosome enable engagement by eEF2,  
62 which catalyzes mRNA and tRNA translocation to complete the elongation cycle (Noller et al.,  
63 2017). Processive elongation reactions repeat over hundreds to thousands of mRNA codons to  
64 synthesize proteins.

65 Multiple natural products identified in phenotypic screens for anticancer or other  
66 biological activities directly target eEF1A (Carelli et al., 2015; Crews et al., 1994; Klein et al.,  
67 2021; Krastel et al., 2015; Lindqvist et al., 2010; Sun et al., 2021). Of these, didemnin B

68 (henceforth "didemnin") and its variants have been studied most extensively, including clinical  
69 trials for the treatment of specific cancer indications (Kucuk et al., 2000; Mittelman et al., 1999;  
70 Taylor et al., 1998; Vera and Joullié, 2002; Williamson et al., 1995) and severe acute respiratory  
71 syndrome coronavirus 2 (SARS-CoV-2 or COVID-19) (White et al., 2021; Yan et al., 2021). A  
72 cryogenic microscopy (cryo-EM) reconstruction of elongating rabbit reticulocyte lysate  
73 ribosomes revealed that didemnin traps eEF1A on the ribosome during aa-tRNA selection  
74 immediately after GTP hydrolysis and inorganic phosphate ( $P_i$ ) release, binding between DI and  
75 DIII of eEF1A (Shao et al., 2016). Ternatin-4, a cyclic peptide chemically unrelated to didemnin  
76 (**Figure 1—figure supplement 1**), also targets eEF1A competitively with didemnin to inhibit  
77 translation elongation (Carelli et al., 2015). A homozygous DIII point mutation (A399V) in eEF1A  
78 adjacent to the didemnin binding site confers nearly complete protection against the  
79 antiproliferative effects of ternatin-4 in HCT116 cells (Carelli et al., 2015). By contrast, cells  
80 harboring mutant eEF1A(A399V) are only partially resistant to didemnin (Krastel et al., 2015).

81 Here, we use single-molecule fluorescence resonance energy transfer (smFRET)  
82 imaging and comparative cryo-EM structural analysis of partially and fully reconstituted  
83 mammalian ribosome complexes to elucidate the effects of didemnin and ternatin-4 on aa-tRNA  
84 selection. We show that despite sharing the same allosteric binding site on eEF1A, didemnin  
85 and ternatin-4 differentially perturb the conformational dynamics of ribosome-associated  
86 eEF1A(GTP)-aa-tRNA ternary complex in ways that correlate with their effects on cellular  
87 growth and protein synthesis. These observations shed light on how these drugs impact the  
88 rate-determining conformational changes in eEF1A that govern aa-tRNA accommodation prior  
89 to peptide-bond formation.

90

## 91 **Results**

### 92 **Didemnin and ternatin-4 inhibit aa-tRNA accommodation**

93 We set out to examine the mechanistic impacts of didemnin and ternatin-4 on the process of aa-  
94 tRNA selection on human ribosomes using a smFRET platform that enables interrogation of  
95 purified, reconstituted human translation elongation reactions (Ferguson et al., 2015). This  
96 platform has been successfully employed to dissect kinetic and structural features of the  
97 eukaryotic elongation cycle as well as its modulation by plant and microbial natural products  
98 (Flis et al., 2018; McMahon et al., 2019; Pellegrino et al., 2019; Prokhorova et al., 2017).  
99 Analogous to prior investigations of the bacterial aa-tRNA selection mechanism (Blanchard et  
100 al., 2004a; Geggier et al., 2010; Juetter et al., 2016), this smFRET platform monitors the change  
101 in distance between fluorescently labeled incoming A-site aa-tRNA and P-site tRNA. These  
102 measurements yield quantitative structural and kinetic data that define the aa-tRNA selection  
103 mechanism, including the rates of eEF1A(GTP)-aa-tRNA ternary complex binding and the  
104 stepwise progression of aa-tRNA through distinct codon-recognition (CR), GTPase-activated  
105 (GA), and fully accommodated (AC) positions within the A site of the ribosome *en route* to  
106 peptide bond formation (**Figure 1A**) (Ferguson et al., 2015; Geggier et al., 2010).

107 Functional human 80S initiation complexes (ICs) were reconstituted from ribosomal  
108 subunits isolated from HEK293T cells, synthetic mRNA, and fluorescently labeled initiator tRNA  
109 (Ferguson et al., 2015) (Methods). Human ICs were surface-tethered within passivated  
110 microfluidic flow cells by a biotin-streptavidin bridge on the 5' end of the mRNA (Juetter et al.,  
111 2016). Ternary complex was formed with eEF1A purified from rabbit reticulocyte lysate (identical  
112 in primary sequence to human eEF1A1), fluorescently labeled Phe-tRNA<sup>Phe</sup>, and GTP  
113 (Methods). Pre-formed ternary complex was stopped-flow delivered to the immobilized ICs while  
114 imaging in real time to assess the specific effects of didemnin and ternatin-4 (Methods).

115 In the absence of inhibitor, the process of aa-tRNA selection was accompanied by a  
116 stepwise progression of aa-tRNA into the A site, which ultimately achieved a stable AC state,  
117 characterized by high (~0.7) FRET efficiency (**Figure 1A, B**), as shown previously (Ferguson et  
118 al., 2015). As has been described by smFRET and structural studies of bacterial translation

119 (Geggier et al., 2010; Munro et al., 2007; Rundlet et al., 2021; Whitford et al., 2010), the AC state  
120 is consistent with a classical (A/A) peptidyl-tRNA position within the pre-translocation complex  
121 site after peptide bond formation. Consistent with prior investigations in bacteria (Blanchard et  
122 al., 2004b; Geggier et al., 2010; Morse et al., 2020) and mammals (Ferguson et al., 2015),  
123 entrance into the final AC state at the end of aa-tRNA selection was accompanied by transient,  
124 reversible movements through two key intermediates in the aa-tRNA selection process  
125 characterized by low- (CR, ~0.2) and intermediate- (GA, ~0.45) FRET efficiencies (**Figure 1A,**  
126 **B**).

127 Quantitative investigations of bacterial translation have revealed that CR to GA and GA  
128 to AC transitions reflect conformational sampling of aa-tRNA between distinct positions within  
129 the A site that are directly related to the two-step kinetic proofreading mechanism underpinning  
130 decoding fidelity (Blanchard et al., 2004a; Geggier et al., 2010; leong et al., 2016; Morse et al.,  
131 2020; Whitford et al., 2010). The relatively rapid, initial selection phase of aa-tRNA selection  
132 prior to GTP hydrolysis is comprised of rapid reversible transitions between CR and GA-like  
133 states. The relatively slow, proofreading phase of aa-tRNA selection after GTP hydrolysis is  
134 comprised of reversible transitions between GA-like and AC-like states (Geggier et al., 2010;  
135 Morse et al., 2020; Whitford et al., 2010). Hence, processes following GTP hydrolysis are rate-  
136 limiting to the aa-tRNA selection mechanism in both bacteria and mammals.

137 In the presence of 20  $\mu$ M didemnin, ribosome complexes efficiently stalled in a long-  
138 lived, GA-like (~0.45 FRET efficiency) state (**Figure 1C**). These findings are consistent with the  
139 cryo-EM structure of didemnin-stalled elongation complexes isolated from rabbit reticulocyte  
140 lysate, in which peptidyl-tRNA was “classically” positioned within the P site (“P/P” configuration)  
141 and aa-tRNA adopted a bent “A/T” configuration bound to eEF1A at the subunit interface (Shao  
142 et al., 2016). This structure revealed that eEF1A was trapped in an active, GTP-bound  
143 conformation even after GTP hydrolysis and  $P_i$  release. These findings are also in line with  
144 extensive investigations of antibacterial compounds (i.e. kirromycin) that bind directly to EF-Tu,

145 the bacterial homolog of eEF1A, to trap ternary complex on the bacterial ribosome in analogous  
146 GA-like states after GTP hydrolysis and  $P_i$  release (Fischer et al., 2015; Schmeing et al., 2009).

147 In the presence of 20  $\mu$ M ternatin-4, we obtained results highly similar to those observed  
148 with didemnin (**Figure 1D**). Hence, both didemnin and ternatin-4 trap eEF1A on the leading  
149 edge of the human ribosome in intermediate states of aa-tRNA selection by slowing processes  
150 required for aa-tRNA accommodation from a timescale of hundreds of milliseconds to minutes.  
151 The finding that both structurally and chemically distinct molecules trap aa-tRNA in a GA-like  
152 state argues that they similarly inhibit the proofreading stage of aa-tRNA selection. More  
153 specifically, they likely slow the rate-limiting conformational changes within eEF1A(GTP/GDP)-  
154 aa-tRNA complex that allow aa-tRNA accommodation.

155 Quantifying the fraction of smFRET trajectories that rapidly reached the AC state, thus  
156 considered molecules that escaped drug inhibition, revealed similar dose-dependent inhibition  
157 profiles for didemnin and ternatin-4 (**Figure 1E, F**), with  $IC_{50}$  values of  $4.5 \pm 0.6$  nM and  $2.3 \pm$   
158  $0.4$  nM, respectively. The dose-dependent effects of two ternatin variants showed that ternatin-2  
159 was completely inactive and ternatin-3 was  $\sim$ 5-fold less potent than ternatin-4 (**Figure 1—**  
160 **figure supplement 2**), consistent with both eEF1A binding and cell proliferation assays (Carelli  
161 et al., 2015). These data argue that didemnin and ternatin-family cyclic peptides target the  
162 proofreading stage of aa-tRNA selection to prevent aa-tRNA accommodation after GTP  
163 hydrolysis.

164 We substantiated eEF1A as the target of ternatin-4 by performing analogous smFRET  
165 experiments using a recombinantly expressed, human eEF1A(A399V) (**Figure 1—figure**  
166 **supplement 3**; Methods). The eEF1A(A399V) mutant prevents ternatin photo-affinity probe  
167 labeling of eEF1A in cells and elicits partial didemnin resistance to growth inhibition as well as  
168 nearly complete ternatin-4 resistance (Carelli et al., 2015; Krastel et al., 2015). Following a 2-  
169 minute incubation with ribosomes in the absence of inhibitor, recombinant wild-type and  
170 eEF1A(A399V) ternary complexes both promoted formation of the pre-translocation complex in

171 which the adjacently bound P- and A-site tRNAs within the ribosome spontaneously and  
172 reversibly transit classical ( $\sim 0.7$  FRET) and hybrid state positions ( $\sim 0.25$ - $0.45$  FRET; **Figure**  
173 **1G**) (Budkevich et al., 2011; Ferguson et al., 2015). As expected, both didemnin and ternatin-4  
174 effectively prevented pre-translocation complex formation by wild-type eEF1A, yielding a long-  
175 lived GA-like state (**Figure 1H, I**, left panels). By contrast, neither inhibitor (20  $\mu\text{M}$ ) had  
176 discernible effects on pre-translocation complex formation when eEF1A(A399V) was employed  
177 (**Figure 1H, I**, right panels). These observations further validate that the A399V mutation  
178 confers didemnin and ternatin-4 resistance during aa-tRNA selection, likely by weakening small-  
179 molecule interactions with eEF1A DIII.

180

### 181 **Elongation complexes trapped by didemnin and ternatin-4 exhibit distinct dynamics**

182 As observed for drugs that target EF-Tu during bacterial aa-tRNA selection (Geggier et al.,  
183 2010; Morse et al., 2020), examination of smFRET traces obtained from pre-steady-state aa-  
184 tRNA selection studies revealed that the GA-like intermediate state captured by didemnin or  
185 ternatin-4 exhibited transient excursions to both lower- and higher-FRET states (**Figure 1C, D**).  
186 The apparent rates of both types of transitions were low, on the order of  $0.1 \text{ s}^{-1}$  (**Table S1**).  
187 According to the kinetic model of aa-tRNA selection defined in bacteria (Geggier et al., 2010;  
188 Morse et al., 2020), these excursions correspond to CR and AC states, respectively.

189 To gain insights into the mechanistic impacts of didemnin and ternatin-4 and on eEF1A,  
190 we further analyzed the individual smFRET traces using hidden Markov modeling, aiming to  
191 determine inhibitor-specific differences in the occupancy and kinetic properties of higher,  
192 transient FRET state excursions (McKinney et al., 2006; Munro et al., 2007; Qin, 2004). We  
193 focused specifically on AC-like intermediate states sampled prior to the first evidence of a fully  
194 accommodated (AC or AC-like) state, which were defined as lasting  $\geq 150$  ms (Methods).

195 We first assessed conformational dynamics at the ensemble level by compiling transition  
196 density plots (TDPs), in which the FRET values from each single-molecule trajectory



197 immediately before and after a specific FRET transition are revealed as well as the relative  
198 transition frequency (McKinney et al. 2006). Comparison of TDPs in the presence of didemnin  
199 and ternatin-4 revealed that both inhibitors specifically reduced the frequency of higher-FRET  
200 transitions that normally accompany the aa-tRNA selection process (**Figure 2A-C**). Notably,  
201 excursions to AC-like states were more frequent in the presence of saturating ternatin-4 than  
202 didemnin (**Figure 2B-D**). This distinction paralleled a reduction in the overall GA-like state  
203 lifetime (**Figure 2E** and **Table S1**). These analyses therefore suggest that ternatin-4 is less  
204 efficient than didemnin in preventing conformational processes within eEF1A that allow aa-tRNA  
205 to enter the PTC.

206 To discern whether the excursions to AC-like states are representative of on-pathway  
207 intermediates of the aa-tRNA selection reaction coordinate, we determined the rate at which  
208 individual aa-tRNAs eventually formed pre-translocation complexes in the presence of  
209 saturating didemnin or ternatin-4. These aa-tRNA selection studies were performed at a lower  
210 frame rate (1 Hz) to reduce photobleaching and in the presence of cycloheximide (CHX, 350  
211  $\mu\text{M}$ ), which depopulates hybrid tRNA positions (Ferguson et al., 2015; Garreau de Loubresse et  
212 al., 2014) that complicate analyses of the apparent didemnin and ternatin-4 stabilized, GA-like  
213 state lifetimes. Under these conditions, we observed that aa-tRNA accommodated  $\sim 8.5$ -times  
214 faster in the presence of saturating ternatin-4 concentrations compared to saturating didemnin  
215 concentrations ( $6 \times 10^{-4} \text{ s}^{-1}$  vs.  $7 \times 10^{-5} \text{ s}^{-1}$ , respectively) (**Figure 2—figure supplement 1A**).  
216 These results are consistent with the model that AC-like state excursions on the human  
217 ribosome represent transient, on-pathway intermediates in the selection process. We  
218 correspondingly infer that ternatin-4 is less efficient than didemnin at inhibiting the  
219 conformational processes in eEF1A underpinning aa-tRNA accommodation during the  
220 proofreading stage of the tRNA selection.

221 We next sought to distinguish whether the observed excursions to AC-like states reflect  
222 differences in drug dissociation kinetics or differences in eEF1A dynamics while the drugs

223 remain bound. To do so, we measured the rate of aa-tRNA accommodation from inhibitor-  
224 stalled GA-like states following rapid drug washout from the imaging chamber. Here, inhibitor  
225 dissociation from eEF1A is expected to enable rapid aa-tRNA accommodation, resulting in a  
226 CHX-stabilized, pre-translocation complex. Notably, the apparent drug dissociation rates were  
227 >30-fold lower than the frequency of eEF1A conformational changes that allow aa-tRNA to  
228 sample AC-like states in the presence of saturating inhibitors (**Figures 1C, D and 2B, C**). We  
229 further conclude that ternatin-4 dissociates ~25-fold faster than didemnin from stalled elongation  
230 complexes ( $\sim 5 \times 10^{-3} \text{ s}^{-1}$  vs.  $\sim 2 \times 10^{-4} \text{ s}^{-1}$ , respectively, **Figure 2H, I and Figure 2—figure**  
231 **supplement 1B-D**).

232 By inference from mechanistic investigations of aa-tRNA selection on the bacterial  
233 ribosome (Geggier et al., 2010; Morse et al., 2020), and the cryo-EM structure of the didemnin-  
234 stalled aa-tRNA selection intermediate isolated from rabbit reticulocyte lysate, we propose that  
235 didemnin and ternatin-4 inhibit essential domain separation processes within eEF1A after GTP  
236 hydrolysis that govern the proofreading mechanism of aa-tRNA selection. We surmise from our  
237 analyses that the FRET excursions in the presence of drug occur while didemnin and ternatin-4  
238 remain bound to eEF1A on the ribosome. Further, we posit that AC-like excursions of aa-tRNA  
239 towards the PTC are coupled to such conformational events in eEF1A and that these events are  
240 differentially inhibited by didemnin and ternatin-4 binding.

241

#### 242 **Ternatin-4 occupies the same binding site as didemnin on eEF1A**

243 To compare the didemnin and ternatin-4 binding sites on eEF1A, we employed ternatin-4 in  
244 procedures analogous to those used to solve a didemnin-stalled aa-tRNA selection  
245 intermediate by cryo-EM (Shao et al., 2016). Ternatin-4 was added to rabbit reticulocyte lysate  
246 followed by immunoprecipitation procedures to pull down actively translating ribosomes via the  
247 nascent peptide (Shao et al., 2016). These efforts yielded a cryo-EM reconstruction of a  
248 ternatin-4/eEF1A/ribosome complex that resolved to 4.1 Å (**Figure 3—figure supplement 1**

249 and **Table S2**). Global features of this map and the position of ternary complex within the  
250 ribosomal A site were highly similar to the structure stabilized by didemnin (**Figure 3A, B**),  
251 though the density for aa-tRNA and eEF1A was less well resolved, consistent with ternatin-4  
252 allowing increased ternary complex mobility (**Figure 3—figure supplement 1B**).

253 In the presence of ternatin-4, the ribosome adopts an unrotated conformation, with the  
254 aa-tRNA in a GA-like conformation within the ribosomal A site and eEF1A bound to the GAC of  
255 the LSU, docking against the catalytic Sarcin ricin loop (**Figure 3A**). Superposition of the cryo-  
256 EM density from the ternatin-4-stalled complex with the atomic model of the didemnin-stalled  
257 complex (Shao et al., 2016) revealed clear density in the cleft between eEF1A DI (G domain)  
258 and III, which we interpret as ternatin-4 (**Figure 3B**). The position of this density overlaps with  
259 the didemnin binding site near Ala399 (**Figure 3C-E**), consistent with the A399V resistance  
260 mutation disrupting the drug binding pocket via steric clash. The computationally derived binding  
261 pose of ternatin on eEF1A (Sánchez-Murcia et al., 2017) also closely matched our  
262 experimental density (**Figure 3—figure supplement 2**).

263 To connect structural features with the inhibition mechanisms of didemnin and ternatin-4,  
264 we reconstituted human 80S ICs using reagents and procedures analogous to those used for  
265 our smFRET studies for cryo-EM analysis. Guided by our smFRET experiments, ternary  
266 complex was delivered to human ICs in the presence of either didemnin (200 nM) or ternatin-4  
267 (20  $\mu$ M) and flash frozen on cryo-EM grids within 2 minutes. The resulting human 80S tRNA  
268 selection intermediate structures were notably similar to those isolated from rabbit reticulocyte  
269 lysate with higher global nominal resolution (**Figure 3—figure supplement 3, 4 and Table S2**).  
270 These structures showed an increased quality of density for the tRNAs resulting from the  
271 reconstituted nature of the ICs. As was observed in the elongating rabbit structures, the cryo-  
272 EM density for eEF1A and aa-tRNA was better resolved in the didemnin-stalled human 80S  
273 structure than that stalled by ternatin-4 (**Figure 3—figure supplement 3D, E**). Consistent with  
274 the differences in the “on-ribosome” ternary complex dynamics revealed by smFRET, the

275 human sample stalled by ternatin-4 required nearly three times the number of micrographs as  
276 the sample stalled by didemnin to yield a structure with well-defined cryo-EM density for eEF1A  
277 (**Figure 3—figure supplement 3**). These findings definitively show that didemnin and ternatin-4  
278 share the same allosteric binding site on eEF1A and suggest that both inhibitors restrict  
279 conformational changes in eEF1A that accompany or facilitate aa-tRNA accommodation after  
280 GTP hydrolysis, likely related to the separation of the DI/III interface where drug binding occurs.

281

### 282 **Ternatin-4 traps eEF1A on the ribosome with disordered switch loops**

283 Inspection of the G domain (DI) of eEF1A in the ternatin-4-bound rabbit 80S complex revealed  
284 no density for a  $\gamma$  phosphate (**Figure 4A, B**), consistent with ternatin-4 stalling of eEF1A after  
285 GTP hydrolysis, as was observed with didemnin (Shao et al., 2016). However, we observed  
286 differences in the stability of the switch-loops of eEF1A's G domain when stalled by didemnin as  
287 compared to ternatin-4—elements that canonically become disordered following GTP  
288 hydrolysis and  $P_i$  release in Ras-family GTPases (Bourne et al., 1991; Gasper and Wittinghofer,  
289 2019). In the ternatin-4-bound rabbit 80S complex, the switch-I and -II elements of eEF1A  
290 displayed particularly weak cryo-EM density (**Figure 4A, B**). By contrast, the previously  
291 determined cryo-EM structure of the didemnin-trapped rabbit 80S ribosome (Shao et al., 2016)  
292 exhibited comparatively ordered cryo-EM density for both switch loops despite  $P_i$  dissociation  
293 (**Figure 4B**). This was also true of the didemnin-bound human 80S ribosome reported here  
294 (**Figure 4—figure supplement 1A, B**).

295 Comparatively, the ternatin-4-stalled structures displayed weakened density for the  
296 putative catalytic His95 of switch II, for the hydrophobic gate elements of the p loop (Val16) and  
297 switch I (Ise71), and for the C-terminal helix ( $\alpha 4$ ) of switch I (**Figure 4B** and **Figure 4—figure**  
298 **supplement 1B**). Further, we observed a loss of  $\alpha 4$  residue Arg69 contact with the aa-tRNA  
299 minor groove (**Figure 4B** and **Figure 4—figure supplement 1B**), potentially contributing to the  
300 increase in aa-tRNA dynamics of ternatin-4-stalled ternary complexes seen by smFRET (**Figure**

301 **2A-C**). We did, however, observe maintenance of switch-II hydrophobic gate residue Phe98 and  
302 possibly strengthened contact between switch-I residue Lys51 and the Sarcin ricin loop (**Figure**  
303 **4C** and **Figure 4—figure supplement 1C**). We speculate that these interactions may be critical  
304 for stabilizing eEF1A binding to the LSU and for preventing aa-tRNA accommodation.

305 Notably, we observed weakened density for the C-terminal portion of helix  $\alpha 2$  of eEF1A  
306 in the ternatin-4-stalled complexes (**Figure 4C** and **Figure 4—figure supplement 1C**). This  
307 helical insertion, which is not present in the bacterial equivalent of eEF1A, makes direct contact  
308 with both the SSU and LSU and appears to be stabilized by the active conformation of switch I  
309 in the rabbit didemnin-stalled 80S complex (Shao et al., 2016) as well in human (**Figure 4D** and  
310 **Figure 4—figure supplement 1D**). In the rabbit ternatin-4-stalled structure, contact between  $\alpha 2$   
311 and the LSU appeared weakened compared to the didemnin-stalled structure, while contact  
312 between the  $\alpha 2$  - between the didemnin- and ternatin-4-stalled complexes in this region were  
313 less pronounced (**Figure 4—figure supplement 1D**). In fact, this  $\alpha 2$  to SSU contact appeared  
314 intact in both human structures, bolstered by strong  $\alpha 2$  Phe42 contact with the switch-I N  
315 terminus (**Figure 4C**). This may indicate that loss of  $\alpha 2$  contact with the LSU precedes  
316 dissociation from the SSU along the tRNA selection reaction coordinate.

317 We infer from the observed disordering of aa-tRNA and eEF1A in the ternatin-4-stalled  
318 complexes likely reflects post-GTP hydrolysis eEF1A dynamics within the ternary complex.  
319 Similar concepts were put forward through structural studies of the bacterial aa-tRNA selection  
320 inhibitor kirromycin (Fischer et al., 2015; Schmeing et al., 2009), which targets the equivalent  
321 EF-Tu binding pocket as didemnin and ternatin-4. We note in this context that the increased  
322 dynamics evidenced by the cryo-EM structures of ternatin-4-stalled complexes correlated with  
323 those evidenced by smFRET within the drug-stalled, GA-like state (**Figures 1, 2**).

324

325 **Didemnin, but not ternatin-4, irreversibly inhibits protein synthesis in cells**

326 The observed differences in the structure and dynamics of didemnin- and ternatin-4-stalled  
327 eEF1A on the ribosome prompted us to investigate whether similar kinetic differences could be  
328 discerned in cells. After 4 hours of continuous treatment, both compounds potently inhibited  
329 protein synthesis in HCT116 cells (**Figure 5A**, didemnin  $IC_{50}$  ~7 nM; ternatin-4  $IC_{50}$  ~36 nM), as  
330 measured by metabolic labeling with homopropargylglycine (Hpg) and flow cytometry analysis  
331 (Beatty et al., 2006). Cells treated with ternatin-4 (500 nM, ~14×  $IC_{50}$ ), followed by rigorous  
332 washout, recovered protein synthesis rates to ~25% of starting levels within 22 hours (**Figure**  
333 **5B, C**). By contrast, protein synthesis was undetectable for at least 22 hours followed by  
334 washout in cells treated with saturating didemnin (100 nM, ~14×  $IC_{50}$ ).

335 To substantiate these kinetic differences, we monitored time-dependent induction of  
336 apoptosis under conditions of continuous drug exposure or after a brief pulse, followed by  
337 washout. We used Jurkat cells which are known to undergo rapid apoptosis in the presence of  
338 didemnin (Baker et al., 2002). Continuous exposure to didemnin or ternatin-4 for 24 hours  
339 induced apoptosis in >95% of the cells, with didemnin being ~7-fold more potent than ternatin-4  
340 (**Figure 5—figure supplement 1**, didemnin  $IC_{50}$  ~4 nM; ternatin-4  $IC_{50}$  ~30 nM). Treatment with  
341 saturating didemnin or ternatin-4 induced membrane phosphatidylserine exposure (an early  
342 marker of apoptosis) within 2-4 hours in a subpopulation of cells (**Figure 5D**). A 2-hour pulse  
343 with saturating ternatin-4 was sufficient to induce apoptosis in ~40% of the cells, whereas  
344 rigorous washout followed by 22-hour incubation in compound-free media resulted in no further  
345 cell death (**Figure 5E**). By contrast, cell death increased from ~20% after a 2-hour didemnin  
346 pulse to ~75% after drug washout, consistent with didemnin's ability to inhibit protein synthesis  
347 in a sustained, washout-resistant manner (**Figure 5C**). Collectively, these results demonstrate  
348 clear differences in cellular pharmacology between didemnin and ternatin-4 under conditions of  
349 transient drug exposure followed by washout, which correlate with the ~25-fold higher  
350 dissociation rate of ternatin-4 observed by smFRET (**Figure 2**).

351

## 352 Discussion

353 In this study, we combined the complementary methods of smFRET, cryo-EM, and *in vivo*  
354 translation measurements to reveal the molecular mechanisms by which didemnin and ternatin-  
355 4 inhibit translation in mammals. Both compounds bind an allosteric site at the eEF1A DI/III  
356 interface, which likely prevents the inter-domain rearrangements that allow for aa-tRNA  
357 accommodation into the ribosomal A site and eEF1A dissociation from the ribosome. As a  
358 result, didemnin and ternatin-4 trap eEF1A(GDP)aa-tRNA ternary complex for extended periods  
359 during an intermediate stage of the aa-tRNA selection process. Compared to didemnin, ternatin-  
360 4 traps eEF1A in a more dynamic state, characterized by conformational heterogeneities and a  
361 reduced extent of observable eEF1A-ribosome contacts. While didemnin and ternatin-4 have  
362 similar biochemical potencies in *in vitro* translation reactions, our findings are consistent with  
363 ternatin-4 dissociating ~25× more rapidly than didemnin under washout conditions.  
364 Correspondingly, while didemnin and ternatin-4 inhibited protein synthesis and induced  
365 apoptosis at similar concentrations, didemnin exhibited quasi-irreversible cellular effects  
366 whereas the effects of ternatin-4 were reversible on washout.

367 The *in vivo* residence time of didemnin and ternatin-4 may influence their efficacy and  
368 toxicity profiles. Given the rapid response of some cell lines to eEF1A inhibitors, there is a  
369 possibility for achieving efficacy against rapidly proliferating cells *in vivo* with a ternatin-like  
370 inhibitor, while sparing the broad toxicity of irreversible translation inhibition. Indeed, we have  
371 recently found that a hydroxylated variant of ternatin-4 is efficacious in a mouse model of MYC-  
372 dependent B cell lymphoma (Wang et al., 2020). Additionally, subtle differences in the  
373 mechanism of competitive inhibitors can lead to dramatic differences in toxicity and potential  
374 therapeutic utility, as was observed for vinca domain-binding tubulin modulators (Wieczorek et  
375 al., 2016). Recent work has found ternatin-4 to have an IC<sub>90</sub> of 15 nM against SARS-CoV-2 *in*  
376 *vitro* (Gordon et al., 2020), underscoring the value of translation-targeting drugs to human  
377 therapeutics. A related study found that plitidepsin (also known as dehydrodidemnin B, a close

378 structural relative of didemnin B originally advanced in clinical trials for the treatment of multiple  
379 myeloma) also possessed potent antiviral activity against SARS-CoV-2 with an IC<sub>90</sub> of 0.88 nM  
380 (White et al., 2021). Identifying the molecular context that determines sensitivity or resistance to  
381 didemnins and ternatins will likely be invaluable for identifying unexploited and forthcoming  
382 therapeutic applications of eEF1A inhibitors.

383

## 384 **Materials and Methods**

### 385 ***Ribosome subunit isolation for human smFRET and cryo-EM analysis***

386 Human ribosome subunits were isolated from adherent HEK293T cells as described previously  
387 (Ferguson et al., 2015). Cells were grown in high-glucose Dulbecco's modified Eagle's medium  
388 (Life Technologies) supplemented with 10% fetal bovine serum (Atlanta Biologicals) and 1%  
389 penicillin/streptomycin (Life Technologies). At ~75% confluency, 350 μM cycloheximide (CHX)  
390 was added to the medium and incubated for 30 min. Cells were detached with 0.05% Trypsin-  
391 EDTA supplemented with 350 μM CHX, pelleted and flash-frozen in liquid nitrogen for storage.

392 For ribosome isolation, cells were thawed on ice and resuspended in lysis buffer (20 mM  
393 Tris HCl pH 7.5, 10 mM KCl, 5 mM MgCl<sub>2</sub>, 1 mM DTT, 5 mM putrescine, 350 μM CHX, 4 U/ml  
394 RNase Out (Thermo Fisher), 1 × Halt Protease Inhibitor Cocktail without EDTA (Thermo  
395 Fisher)), followed by addition of 0.5% (v/v) NP-40, 0.5% (w/v) sodium deoxycholate, and  
396 20 U/ml Turbo DNase (ThermoFisher) and incubation at 4°C for 20 minutes while rotating.  
397 Lysate was clarified by brief centrifugation, loaded onto pre-chilled 10-50% sucrose gradients  
398 prepared in polysome gradient buffer (20 mM Tris HCl pH 7.5, 10 mM KCl, 5 mM MgCl<sub>2</sub>, 1 mM  
399 DTT, 5 mM putrescine, 350 μM CHX), and centrifuged for 3 hours at 110 krcf, 4°C. Gradients  
400 were analyzed following standard procedures on a gradient fractionator (Brandel) with UV  
401 absorbance detector (Teledyne Isco), polysome fractions were collected and pelleted for  
402 18 hours at 125 krcf, 4°C. Polysome pellets were rinsed and resuspended in resuspension  
403 buffer (20 mM Tris HCl pH 7.5, 50 mM KCl, 1.5 mM MgCl<sub>2</sub>, 1 mM DTT), followed by addition of  
404 1 mM puromycin, raising the KCl concentration to 500 mM, 30 minutes incubation at 4°C with  
405 rotation, and 15 minutes incubation at 37°C. The solution was cleared by centrifugation, loaded  
406 onto 15-30% sucrose gradients prepared in subunit gradient buffer (5 mM Tris HCl pH 7.5,  
407 500 mM KCl, 2.5 mM MgCl<sub>2</sub>, 1 mM DTT) and centrifuged for 14 hours at 50 krcf, 20°C.  
408 Gradients were analyzed as before and individual 40S and 60S subunit fractions were collected,  
409 followed by centrifugation for 3 hours (60S) or 6 hours (40S) at 425 krcf, 4°C. Subunit pellets  
410 were resuspended in 80S polymix buffer (30 mM HEPES pH 7.5, 5 mM MgCl<sub>2</sub>, 50 mM NH<sub>4</sub>Cl,  
411 5 mM Putrescine, 2 mM Spermidine, 1 mM DTT), aliquoted, and flash-frozen in liquid nitrogen.

412

### 413 ***Human 80S IC formation for smFRET and cryo-EM***

414 For smFRET analyses, synthetic mRNA (Dharmacon, sequence CAA CCU AAA ACU UAC ACA  
415 CCC UUA GAG GGA CAA UCG **AUG UUC AAA** GUC UUC AAA GUC AUC) was prepared for  
416 surface immobilization in the following way: 45 μM each of DNA oligonucleotides A (AAA AAA  
417 AAA AAA AAA AAA AAA AAA AAA) and B (GTA AGT TTT AGG TTG CCC CCC TTT TTT



418 TTT TTT TTT TTT TTT TTT TTT TTT with 3'-Biotin-TEG modification) in hybridization buffer  
419 (10 mM HEPES pH 7, 150 mM KCl, 0.5 mM EDTA) were heated to 95°C for 5 minutes and  
420 annealed on ice for 5 min. The annealed oligonucleotide (20 µM) and mRNA (20 µM) in  
421 hybridization buffer were incubated for 5 minutes at 37°C and for 5 minutes on ice. For smFRET  
422 analyses, tRNA<sup>fMet</sup> isolated from *E. coli* was labeled with Cy3 at the s<sup>4</sup>U8 residue following  
423 established procedures (Blanchard et al., 2004b). Cy3-labeled (smFRET) or unlabeled (cryo-EM)  
424 tRNA<sup>fMet</sup> was aminoacylated by incubation of 30 or 120 pmol of tRNA, respectively, with 50 mM  
425 Tris pH 8, 25 mM KCl, 100 mM NH<sub>4</sub>Cl, 10 mM MgCl<sub>2</sub>, 1 mM DTT, 5 mM ATP, 0.5 mM EDTA,  
426 5 mM Met amino acid, 600 nM Met-RS in a 10-20 µl reaction at 37°C for 15 min.

427 Human 80S ICs for smFRET and cryo-EM were formed by incubating 20 or 100 pmol of  
428 40S subunits (heat-activated at 40°C for 5 min), respectively, and 4× molar excess of prepared  
429 mRNA/DNA duplex (smFRET) or mRNA (cryo-EM) in 80S polymix for 10 minutes at 37°C and  
430 for 5 minutes on ice. The freshly prepared aminoacylated tRNA was added, followed by  
431 incubation for 10 minutes at 37°C and for 5 minutes on ice. Equimolar 60S subunits (heat-  
432 activated at 40°C for 5 min) were added (final reaction volume 50-100 µl) and the reaction  
433 mixture was incubated for 20 minutes at 37°C and for 5 minutes on ice. MgCl<sub>2</sub> concentration  
434 was then adjusted to 15 mM and the reaction mixture was loaded onto a 10-30% sucrose  
435 gradient prepared in 80S polymix as above but with 15 mM MgCl<sub>2</sub>. Gradients were centrifuged  
436 at 150 krcf, 4°C for 90 minutes and analyzed as described above, collecting the fraction  
437 corresponding to 80S complexes. For smFRET, the resulting fractions aliquoted and flash-  
438 frozen in liquid nitrogen. For cryo-EM analysis, 80S ICs were pelleted at 150 krcf, 4°C for  
439 90 minutes and resuspended in a minimal volume of 80S polymix with 5 mM MgCl<sub>2</sub> for a final  
440 concentration of 2-3 µM.

441  
442 **Purification of rabbit eEF1A**

443 Rabbit reticulocyte lysate (Green Hectares) was thawed, supplemented with 1 × Mammalian  
444 ProteaseArrest (G-Biosciences), 1 mM phenylmethane sulfonyl fluoride, and 500 mM KCl,  
445 layered onto a cushion of 20 mM Tris HCl pH 7.5, 1 M sucrose, 500 mM KCl, 5 mM MgCl<sub>2</sub>,  
446 1 mM DTT, 20% glycerol, and centrifuged for 14 hours at 125 krcf, 4°C. The supernatant was  
447 fractionated by precipitation with increasing concentrations of (NH<sub>4</sub>)<sub>2</sub>SO<sub>4</sub> by gradual addition of  
448 saturated solution while stirring at 4°C. The fraction corresponding to 30-40% saturation was  
449 centrifuged for 20 minutes at 25 krcf, 4°C. Pellets were resuspended into and dialyzed against  
450 Buffer A (20 mM Tris-HCl pH 7.5, 50 mM KCl, 0.1 mM EDTA, 0.25 mM DTT, 20% glycerol).

451 The sample was then further purified by three ion-exchange steps. In each step,  
452 fractions enriched in eEF1A were detected by Western Blot analysis (primary antibody: Millipore  
453 05-235, used at 1:2000 dilution in TBST with 5% w/v dry milk). The columns used for the three  
454 steps were (i) DEAE FF HiPrep 16/10, (ii) SP HP 5 mL HiTrap, (iii) Mono S 5/50 GL (all from  
455 GE). In all three steps, Buffer A was used for column equilibration and sample loading; a  
456 gradient into Buffer B (identical to Buffer A but with 1 M KCl) was used for elution. In step (i),  
457 eEF1A was enriched in the flow-through, in subsequent steps, it was enriched in the eluted  
458 fractions. After steps (i) and (ii), the most enriched fraction as identified by Western Blot was  
459 dialyzed against Buffer A; after step (iii), the final product (~85% pure) was dialyzed against  
460 storage buffer (20 mM Tris HCl pH 7.5, 25 mM KCl, 6 mM BME, 5 mM Mg(OAc)<sub>2</sub>, 60% glycerol)  
461 and stored at -20°C.

462

### 463 **smFRET analysis of aa-tRNA selection**

464 smFRET experiments were performed on a custom-built prism-type TIRF microscope as  
465 described previously (Juetten et al., 2016). Briefly, biotinylated 80S ICs were immobilized in flow  
466 cells treated with a mixture of polyethylene glycol (PEG) and PEG-biotin and functionalized with  
467 streptavidin (Blanchard et al., 2004b). For aa-tRNA selection experiments, ternary complex  
468 containing *E. coli* Phe-tRNA<sup>Phe</sup> labeled with Cy3 at position acp<sup>3</sup>U47 (Blanchard et al., 2004b),  
469 rabbit eEF1A, and GTP was delivered by manual injection at a final concentration of 20 nM. All  
470 experiments were performed in 80S polymix buffer with 5 mM MgCl<sub>2</sub> as above. A 532 nm diode-  
471 pumped solid-state laser (Opus, LaserQuantum) was used for Cy3 excitation, fluorescence was  
472 collected through a 60×/1.27 NA water-immersion objective (Nikon), spectrally separated using  
473 a T635lpxr-UF2 dichroic mirror (Chroma) and imaged onto two cameras (Orca-Flash 4.0 v2,  
474 Hamamatsu). Time resolution was 15 ms for all experiments except for the sneak-  
475 through/wash-out experiments shown in Figure 2F-I, which were performed at 1 s time  
476 resolution.

477

### 478 **smFRET data processing and analysis**

479 Single-molecule fluorescence and FRET traces were extracted and further analyzed using our  
480 freely available MATLAB-based software platform SPARTAN (Juetten et al., 2016)  
481 (<http://scottcblanchardlab.com/software>), extended with custom scripts. For display of example  
482 traces (Figure 1) and all quantitative analysis, traces were idealized using the sequential k-  
483 means algorithm based on a hidden Markov model (Qin, 2004). For display of non-equilibrium  
484 aa-tRNA selection data, all detected events were post-synchronized by aligning them to the first  
485 appearance of FRET. FRET contour plots were generated by compiling 2-dimensional  
486 histograms of FRET occupancy over time for all traces. For dose-response curves (Figure 1E, F  
487 and Figure 1—figure supplement 1), accommodated molecules were defined as events  
488 spending 300 ms or more in high-FRET. EC<sub>50</sub> values were obtained by fitting a Hill equation to  
489 the accommodated fraction as a function of drug concentration. To assess kinetic differences  
490 during aa-tRNA selection (Figure 2), the analysis of each idealized FRET trace was restricted to  
491 the time interval prior to the first dwell in high FRET lasting 150 ms or more (shorter than the  
492 above-mentioned definition of accommodated molecules to reduce contributions from molecules  
493 achieving hybrid states after accommodation). These truncated, idealized traces were used for  
494 the computation of state lifetimes and transition ratios. Error bars in Figure 1E, F, Figure 1—  
495 figure supplement 1, and Figure 2D, E represent standard errors obtained by bootstrap analysis  
496 (1000 samples) of the pooled data from all experimental repeats.

497

### 498 **Rabbit *in vitro* translation and cryo-EM sample preparation**

499 *In vitro* translation reactions of a transcript encoding 3× Flag-tagged KRas were performed in a  
500 rabbit reticulocyte lysate (RRL) system at 32°C as previously described (Shao et al., 2016;  
501 Sharma et al., 2010). A transcript encoding 3× Flag-tagged KRas was translated *in vitro*. A final  
502 concentration of 50 μM ternatin-4 was added after 7 minutes to stall ribosome-nascent chain  
503 complexes (RNCs) at the stage of aa-tRNA delivery by eEF1A and the reaction allowed to  
504 proceed to 25 min. A 4 ml translation reaction was directly incubated with 100 μl (packed  
505 volume) of anti-Flag M2 beads (Sigma) for 1 hour at 4°C with gentle mixing. The beads were

506 washed sequentially with 6 ml of buffer (50 mM HEPES pH 7.4, 5 mM Mg(OAc)<sub>2</sub>, and 1 mM  
507 DTT) containing the additional components as follows: (1) 100 mM KOAc and 0.1% Triton X-  
508 100; (2) 250 mM KOAc 0.5% and Triton X-100; (3, RNC buffer) 100 mM KOAc. Two sequential  
509 elutions were carried out with 100 µl 0.1 mg/ml 3× Flag peptide (Sigma) in RNC buffer at room  
510 temperature for 25 min. The elutions were combined and centrifuged at 100,000 rpm at 4°C for  
511 40 minutes in a TLA120.2 rotor (Beckman Coulter) before resuspension of the ribosomal pellet  
512 in RNC buffer containing 1 µM ternatin-4. The resuspended RNCs were adjusted to 120 nM and  
513 directly frozen to grids for cryo-EM analysis.

514 R2/2 grids (Quantifoil) were covered with a thin layer of continuous carbon (estimated to  
515 be 50 Å thick) and glow discharged to increase hydrophilicity. The grids were transferred to a  
516 Vitrobot MKIII (FEI) with the chamber set at 4°C and 100% ambient humidity. Aliquots of purified  
517 RNCs (3 µl, ~120 nM concentration in 50 mM HEPES pH 7.4, 100 mM KOAc, 5 mM Mg(OAc)<sub>2</sub>,  
518 1 mM DTT and 1 µM ternatin-4) were applied to the grid and incubated for 30 s, before blotting  
519 for 3 s to remove excess solution, and vitrified in liquid ethane.

520

#### 521 **Sample preparation for human cryo-EM structure determination**

522 Gold R1.2/1.3 300 mesh grids (UltraAuFoil) were plasma cleaned (ArO<sub>2</sub>, 7 s) and transferred to a  
523 Vitrobot MKII (FEI) with the chamber set at 4°C and 100% ambient humidity. Aliquots of purified  
524 human 80S ICs in 80S polymix buffer were thawed and brought to 0.2 µM didemnin B  
525 (didemnin) or 20 µM ternatin-4. Ternary complex containing *E. coli* Phe-tRNA<sup>Phe</sup>, rabbit eEF1A,  
526 GTP, and either 0.2 µM didemnin or 20 µM ternatin-4 were added to 80S ICs for final  
527 concentrations of ~200 nM 80S and aa-tRNA. aa-tRNA selection reactions were applied to the  
528 grid (3 µl) and incubated for ~45 s, before blotting for 2-3 s to remove excess solution, and  
529 vitrified in liquid ethane.

530

#### 531 **Cryo-EM data collection and image processing for the rabbit structure**

532 All micrographs of rabbit 80S ribosomes were taken on an FEI Titan Krios microscope (300 kV)  
533 equipped with an FEI Falcon II direct-electron detector using quasi-automated data collection  
534 (EPU software, FEI). Movies were recorded at a magnification of ~135,000 ×, which  
535 corresponds to the calibrated pixel size of 1.04 Å per pixel at the specimen level. During the 1-s  
536 exposure, 40 frames (0.06 s per frame) were collected with a total dose of around 40 e<sup>-</sup> per Å<sup>2</sup>.  
537 Movie frames were aligned using whole-image motion correction (Li et al., 2013). Parameters of  
538 the contrast transfer function (CTF) for each motion-corrected micrograph were obtained using  
539 Gctf (Zhang, 2016). Visual inspection of the micrographs and their corresponding Fourier  
540 transforms was used to removed micrographs due to astigmatism, charging, contamination,  
541 and/or poor contrast.

542 Ribosome particles were selected from the remaining micrographs using semi-  
543 automated particle picking implemented in RELION 1.4 (Scheres, 2015). Reference-free two-  
544 dimensional class averaging was used to discard non-ribosomal particles. The retained particles  
545 underwent an initial three-dimensional refinement using a 30 Å low-pass filtered cryo-EM  
546 reconstruction of the mammalian ribosomal elongation complex (EMDB-4130) as an initial  
547 model. After refinement, the particles were then subjected to three-dimensional classification to  
548 separate different compositions and conformations of the ribosome complexes and isolate  
549 particles with high occupancy of the desired factors. From this classification, particles containing

550 P- and E-site tRNAs were selected and re-refined. The movement of each particle within this  
551 subset was further corrected using RELION 1.4 (Scheres, 2015). The resulting ‘shiny’ particles  
552 were subjected to focused classification with signal subtraction (FCwSS) (Bai et al., 2015) to  
553 isolate particles containing pre-accommodated aa-tRNA and eEF1A. An additional round of 3D  
554 refinement was used to obtain the final map, which reached an overall resolution of 4.1 Å based  
555 on the Fourier shell correlation (FSC) 0.143 criterion (Rosenthal and Henderson, 2003). During  
556 post-processing, high-resolution noise substitution was used to correct for the effects of a soft  
557 mask on FSC curves (Chen et al., 2013) and density maps were corrected for the modulation  
558 transfer function (MTF) of the Falcon II detector and sharpened by applying a negative B-factor  
559 that was estimated using automated procedures (Rosenthal and Henderson, 2003). See Figure  
560 3—figure supplement 1 and Table S2 for details.

561  
562 ***Cryo-EM data collection and image processing for the human structures***  
563 All micrographs of human 80S ribosomes were taken on an FEI Titan Krios microscope (300  
564 kV) equipped with an Gatan K2 Summit direct electron detector using Legimon MSI (Suloway et  
565 al., 2005) data collection. For didemnin, movies were recorded in counting mode at a  
566 magnification of 105,000 × (~1.072 Å<sup>2</sup> per pixel) with 10-s exposure for 50 frames (0.2 s per  
567 frame) with a total dose of around 67 e<sup>-</sup> per Å<sup>2</sup>. For ternatin-4, movies were recorded in super  
568 resolution mode at a magnification of 105,000 × (~1.096 Å<sup>2</sup> per pixel after 2×binning) with 10-s  
569 exposure for 50 frames (0.2 s per frame) with a total dose of around 70 e<sup>-</sup> per Å<sup>2</sup>. See Table S2  
570 for details. Movie frames were aligned using whole-image motion correction (Li et al., 2013).  
571 CTF parameters of the contrast transfer function for each motion-corrected micrograph were  
572 obtained using CTFFIND4 (Rohou and Grigorieff, 2015). Visual inspection of the micrographs  
573 and their corresponding Fourier transforms was used to removed micrographs due to  
574 astigmatism, charging, contamination, and/or poor contrast.

575 Ribosome particles were selected from the remaining micrographs using semi-  
576 automated particle picking implemented in RELION 2.0 (Kimanius et al., 2016). Reference-free  
577 two-dimensional class averaging was used to discard non-ribosomal particles. The remaining  
578 particles were subjected to two rounds of three-dimensional classification with alignment to  
579 separate different compositions and conformations of the ribosome complexes, sorting first for  
580 80S particles followed by sorting for rotated and unrotated small ribosomal subunits. Particles  
581 with unrotated subunits were subjected to focused classification and FCwSS (Bai et al., 2015) to  
582 isolate particles containing pre-accommodated aa-tRNA and eEF1A. An additional round of 3D  
583 refinement was used to obtain the final maps, which reached overall resolutions of 3.2 Å and 3.8  
584 Å for didemnin and ternatin-4, respectively, based on the FSC 0.143 criterion (Rosenthal and  
585 Henderson, 2003). During post-processing, noise substitution was used to correct for the effects  
586 of a mask on FSC curves (Chen et al., 2013) and density maps were corrected for the MTF of  
587 the K2 detector and sharpened by applying a -20 B-factor and a 4 Å low pass filter (Rosenthal  
588 and Henderson, 2003). See Figure 3—figure supplement 3 and Table S2 for details.

589  
590 ***Cryo-EM map interpretation***  
591 Density map values were normalized to mean = 0 and standard deviation ( $\sigma$ ) = 1 in UCSF  
592 Chimera (Pettersen et al., 2004) using the vop scale function. The pixel size of each map was  
593 calibrated against a 2.9 Å resolution structure of the mammalian ribosome (PDB-ID: 6QZP)

594 (Natchiar et al., 2017) and maps were aligned on the 60S core. The model of the mammalian  
595 ribosomal elongation complex trapped with didemnin (PDB-ID: 5LZS) (Shao et al. 2016) was  
596 docked into the cryo-EM maps with Chimera (Pettersen et al., 2004). Density present in the  
597 didemnin binding site was interpreted as belonging to didemnin or ternatin-4, respectively. A  
598 model for ternatin-4 was rigid-body fit into the cryo-EM density for figure images. However, as  
599 the density was insufficiently resolved to unambiguously place a model for ternatin-4, the  
600 density was left unmodelled.

601

### 602 ***Homopropargyl glycine metabolic labeling***

603 HCT116 cells were seeded in 24 well plates at 30,000 cells/well and incubated overnight before  
604 4-hour treatment with compound. For experiments involving washout, cells were washed twice  
605 with 1 ml complete media, followed by alternating quick and 5 minutes 37°C washouts repeated  
606 4 times each (O'Hare et al., 2013). After appropriate incubations, cells were washed once with  
607 phosphate-buffered saline (PBS), then exchanged to methionine- and cysteine-free DMEM  
608 (Gibco) supplemented with 10% dialyzed FBS (Sigma), glutamine (2 mM), cysteine (2 mM),  
609 homopropargyl glycine (1 mM; Kerfast), and appropriate drug for 1 hour. Media was then  
610 aspirated, cells were trypsinized and transferred to 96-well plates, washed once with PBS, and  
611 fixable live/dead stained with Zombie Red amine-reactive dye (BioLegend) according to the  
612 manufacturer's instructions. Cells were fixed in 2% paraformaldehyde in PBS for 10 minutes at  
613 room temperature, and then permeabilized in PBS supplemented with 0.1% saponin and 3%  
614 FBS. Samples in 25  $\mu$ l permeabilization buffer were subjected to copper-catalyzed alkyne-azide  
615 conjugation to CF405M-azide (Biotium) by addition of 100  $\mu$ l click reaction mix (50 mM HEPES  
616 pH 7.5, 150 mM NaCl, 400  $\mu$ M TCEP, 250  $\mu$ M TBTA, 200  $\mu$ M CuSO<sub>4</sub>, 5  $\mu$ M azide). After  
617 overnight incubation at room temperature in the dark, samples were washed 3 $\times$  with  
618 permeabilization buffer, 2 $\times$  FACS buffer (PBS –Mg/Ca + 2% FBS + 2 mM EDTA) and analyzed  
619 by flow cytometry (MACSQuant VYB). Data analysis was performed with FlowJo software (Tree  
620 Star). Dead cells (Zombie Red +) were excluded from analysis (typically representing <15% of  
621 total cells), leaving at least 500 live cells for each data point, but additional cells were analyzed  
622 when possible (up to 10,000). IC<sub>50</sub> values and plotted data points (Figure 5) are given as the  
623 mean of three independent determinations  $\pm$  standard error.

624

### 625 ***Apoptosis assay by annexin V/propidium iodide staining***

626 Jurkat cells at  $0.5 \times 10^6$  cells/ml were treated with compound as indicated. For experiments  
627 involving washout, cells were washed twice with 1 ml complete media by pelleting cells for 3  
628 minutes at  $1.3k \times g$  and aspirating media, followed by alternating quick and 5 minutes 37°C  
629 washouts repeated 4 times each (O'Hare et al., 2013). Cells were stained with annexin V-FITC  
630 and propidium iodide (BD Pharmingen) according to the manufacturer's instructions and  
631 analyzed by flow cytometry (MACSQuant VYB). The mean of three independent experiments  $\pm$   
632 standard error is plotted. For each drug treatment condition, 10,000 cells were analyzed.

633

### 634 ***Flag-eEF1A purification***

635 HCT116 cells stably expressing Flag-eEF1A1(WT or A399V)-P2A-mCherry (Carelli et al., 2015)  
636 were lysed in buffer containing 50 mM HEPES pH 7.5, 125 mM KOAc, 5 mM MgOAc<sub>2</sub>, 1%  
637 Triton X-100, 10% glycerol, 1 mM DTT, and 1 $\times$  EDTA-free complete protease inhibitors

638 (Roche). Lysate (8 mg/sample) was incubated with 200  $\mu$ l anti-Flag magnetic beads (Sigma) at  
639 4°C for 90 min. Beads were washed 3 $\times$  with lysis buffer, 3 $\times$  with lysis buffer + 400 mM KOAc,  
640 and 3 $\times$  with elution buffer (50 mM HEPES pH 7.5, 0.1 mM EDTA, 100 mM KCl, 25% glycerol, 1  
641 mM DTT), then eluted in 100 mM elution buffer + 1 mg/ml 3 $\times$  Flag peptide (Sigma) at 4°C for 30  
642 min.

643

#### 644 **Figure preparation**

645 All figures containing cryo-EM density were generated with UCSF Chimera (Pettersen et al.,  
646 2004) or UCSF ChimeraX (Pettersen et al., 2021). Density was colored using the Color Zone  
647 tool in UCSF ChimeraX (Pettersen et al., 2021) with a 3 Å radius. Maps colored by local  
648 resolution were visualized in Chimera using LocalRes in RELION 4.0 (Kimanius et al., 2021)  
649 (Figure 3—figure supplement 1 and 3). All figures were compiled in Adobe Illustrator (Adobe).

650

#### 651 **Rigor and reproducibility**

652 Biological replicates are defined here as independent measurements of physically distinct  
653 samples. Technical replicates are defined as repeated measurements of the same physical  
654 sample. eEF1A used for smFRET and cryo-EM experiments was purified from two distinct  
655 batches of RRL. For smFRET experiments, the number of traces (N) is indicated in each figure  
656 panel and all experiments were performed in biological triplicate and were repeated on different  
657 days. Error bars in smFRET experiments represent standard errors obtained by bootstrap  
658 analysis (1000 samples) of the pooled data from all experimental repeats. The sample size  
659 chosen for bootstrap analysis converged to within the obtainable precision for the experimental  
660 setup, i.e. larger samples would have incurred more computation time without yielding additional  
661 information. For homopropargyl glycine metabolic labeling assays and apoptosis assays, IC<sub>50</sub>  
662 values and plotted data points are given as the mean of three independent biological  
663 determinations  $\pm$  standard error.

664

#### 665 **Data Availability**

666 MATLAB-based software platform for smFRET analysis SPARTAN (Juetten et al., 2016) is freely  
667 available at <http://scottcblanchardlab.com/software>. Cryo-EM 3D maps for all structures are  
668 available through the Electron Microscopy Data Bank (EMDB) as follows: ternatin-4-stalled  
669 elongating rabbit 80S, EMD-27732; didemnin B-stalled human 80S initiation complex, EMD-  
670 27691; ternatin-4-stalled human 80S initiation complex, EMD-27694.

671

#### 672 **Acknowledgements**

673 This work was supported by National Institutes of Health grants GM079238 to S.C.B. We thank  
674 D. Terry, R. Kiselev and other members of the Blanchard laboratory for their expertise and  
675 efforts to enable the single-molecule investigations performed and for their review of the  
676 manuscript during the preparation and completion of this research. We acknowledge support  
677 from the Single-Molecule Center at St. Jude Children's Research Hospital. We thank A. Plante  
678 at Weill Cornell Medicine for guidance in data processing and high-performance computing.  
679 Some of this work was performed at the Simons Electron Microscopy Center and National  
680 Resource for Automated Molecular Microscopy located at the New York Structural Biology  
681 Center, supported by grants from the Simons Foundation (349247), NYSTAR, and the NIH

682 National Institute of General Medical Sciences (GM103310). We acknowledge specific support  
683 from SEMC members B. Carragher, C. Potter, E. Eng, and D. Bobe for guidance with grid  
684 preparation and data collection.

685  
686 **Author Contributions**

687 M.F.J., A.F., M.R.W., and M.H. performed and analyzed smFRET experiments. J.D.C.  
688 performed cellular experiments. A.B. and S.S. performed cryo-EM studies on the rabbit 80S  
689 ribosome. E.J.R. and A.F. performed cryo-EM studies on the human 80S ribosome. M.F.J.,  
690 J.D.C., E.J.R., J.T., and S.C.B. wrote the manuscript. E.J.R. created figure panels and  
691 illustrations. J.T. and S.C.B. initiated and supervised the project.

692  
693 **Competing Interests**

694 S.C.B. holds an equity interest in Lumidyne Technologies. J.T. is listed as an inventor on a  
695 patent application covering ternatin analogs (PCT/US2021/016790, patent pending). All other  
696 authors declare no conflict of interest.

697  
698  
699 **References**

- 700 Abbas W, Kumar A, Herbein G. 2015. The eEF1A Proteins: At the Crossroads of Oncogenesis,  
701 Apoptosis, and Viral Infections. *Front Oncol* **5**:75. doi:10.3389/fonc.2015.00075
- 702 Bai X, Rajendra E, Yang G, Shi Y, Scheres SHW. 2015. Sampling the conformational space of  
703 the catalytic subunit of human  $\gamma$ -secretase. *eLife* **4**:e11182. doi:10.7554/eLife.11182
- 704 Baker MA, Grubb DR, Lawen A. 2002. Didemnin B induces apoptosis in proliferating but not  
705 resting peripheral blood mononuclear cells. *Apoptosis* **7**:407–412.
- 706 Beatty KE, Liu JC, Xie F, Dieterich DC, Schuman EM, Wang Q, Tirrell DA. 2006. Fluorescence  
707 visualization of newly synthesized proteins in mammalian cells. *Angew Chem Int Ed* **45**:7364–  
708 7367. doi:10.1002/anie.200602114
- 709 Behrmann E, Loerke J, Budkevich TV, Yamamoto K, Schmidt A, Penczek PA, Vos MR, Bürger  
710 J, Mielke T, Scheerer P, Spahn CMT. 2015. Structural snapshots of actively translating  
711 human ribosomes. *Cell* **161**:845–857. doi:10.1016/j.cell.2015.03.052
- 712 Bhat M, Robichaud N, Hulea L, Sonenberg N, Pelletier J, Topisirovic I. 2015. Targeting the  
713 translation machinery in cancer. *Nat Rev Drug Discov* **14**:261–278. doi:10.1038/nrd4505
- 714 Blanchard SC, Gonzalez RL, Kim HD, Chu S, Puglisi JD. 2004a. tRNA selection and kinetic  
715 proofreading in translation. *Nat Struct Mol Biol* **11**:1008–1014. doi:10.1038/nsmb831
- 716 Blanchard SC, Kim HD, Gonzalez RL, Puglisi JD, Chu S. 2004b. tRNA dynamics on the  
717 ribosome during translation. *Proc Natl Acad Sci USA* **101**:12893–12898.  
718 doi:10.1073/pnas.0403884101
- 719 Bourne HR, Sanders DA, McCormick F. 1991. The GTPase superfamily: conserved structure  
720 and molecular mechanism. *Nature* **349**:117–127. doi:10.1038/349117a0
- 721 Budkevich T, Giesebrecht J, Altman RB, Munro JB, Mielke T, Nierhaus KH, Blanchard SC,  
722 Spahn CMT. 2011. Structure and dynamics of the mammalian ribosomal pretranslocation  
723 complex. *Mol Cell* **44**:214–224. doi:10.1016/j.molcel.2011.07.040

- 724 Budkevich TV, Giesebrecht J, Behrmann E, Loerke J, Ramrath DJF, Mielke T, Ismer J,  
725 Hildebrand PW, Tung C-S, Nierhaus KH, Sanbonmatsu KY, Spahn CMT. 2014. Regulation of  
726 the mammalian elongation cycle by subunit rolling: a eukaryotic-specific ribosome  
727 rearrangement. *Cell* **158**:121–131. doi:10.1016/j.cell.2014.04.044
- 728 Carelli JD, Sethofer SG, Smith GA, Miller HR, Simard JL, Merrick WC, Jain RK, Ross NT,  
729 Taunton J. 2015. Ternatin and improved synthetic variants kill cancer cells by targeting the  
730 elongation factor-1A ternary complex. *eLife* **4**. doi:10.7554/eLife.10222
- 731 Chen S, McMullan G, Faruqi AR, Murshudov GN, Short JM, Scheres SHW, Henderson R. 2013.  
732 High-resolution noise substitution to measure overfitting and validate resolution in 3D  
733 structure determination by single particle electron cryomicroscopy. *Ultramicroscopy* **135**:24–  
734 35. doi:10.1016/j.ultramic.2013.06.004
- 735 Crews CM, Collins JL, Lane WS, Snapper ML, Schreiber SL. 1994. GTP-dependent binding of  
736 the antiproliferative agent didemnin to elongation factor 1 alpha. *J Biol Chem* **269**:15411–  
737 15414.
- 738 Ferguson A, Wang L, Altman RB, Terry DS, Juette MF, Burnett BJ, Alejo JL, Dass RA, Parks  
739 MM, Vincent CT, Blanchard SC. 2015. Functional Dynamics within the Human Ribosome  
740 Regulate the Rate of Active Protein Synthesis. *Mol Cell* **60**:475–486.  
741 doi:10.1016/j.molcel.2015.09.013
- 742 Fischer N, Neumann P, Konevega AL, Bock LV, Ficner R, Rodnina MV, Stark H. 2015.  
743 Structure of the E. coli ribosome-EF-Tu complex at <3 Å resolution by Cs-corrected cryo-EM.  
744 *Nature* **520**:567–570. doi:10.1038/nature14275
- 745 Flis J, Holm M, Rundlet EJ, Loerke J, Hilal T, Dabrowski M, Bürger J, Mielke T, Blanchard SC,  
746 Spahn CMT, Budkevich TV. 2018. tRNA Translocation by the Eukaryotic 80S Ribosome and  
747 the Impact of GTP Hydrolysis. *Cell Rep* **25**:2676-2688.e7. doi:10.1016/j.celrep.2018.11.040
- 748 Garreau de Loubresse N, Prokhorova I, Holtkamp W, Rodnina MV, Yusupova G, Yusupov M.  
749 2014. Structural basis for the inhibition of the eukaryotic ribosome. *Nature* **513**:517–522.  
750 doi:10.1038/nature13737
- 751 Gasper R, Wittinghofer F. 2019. The Ras switch in structural and historical perspective. *Biol*  
752 *Chem* **401**:143–163. doi:10.1515/hsz-2019-0330
- 753 Geggier P, Dave R, Feldman MB, Terry DS, Altman RB, Munro JB, Blanchard SC. 2010.  
754 Conformational sampling of aminoacyl-tRNA during selection on the bacterial ribosome. *J Mol*  
755 *Biol* **399**:576–595. doi:10.1016/j.jmb.2010.04.038
- 756 Gordon DE, Jang GM, Bouhaddou M, Xu J, Obernier K, White KM, O’Meara MJ, Rezelj VV,  
757 Guo JZ, Swaney DL, Tummino TA, Hüttenhain R, Kaake RM, Richards AL, Tutuncuoglu B,  
758 Foussard H, Batra J, Haas K, Modak M, Kim M, Krogan NJ. 2020. A SARS-CoV-2 protein  
759 interaction map reveals targets for drug repurposing. *Nature* **583**:459–468.  
760 doi:10.1038/s41586-020-2286-9
- 761 Hoang H-D, Neault S, Pelin A, Alain T. 2021. Emerging translation strategies during virus-host  
762 interaction. *Wiley Interdiscip Rev RNA* **12**:e1619. doi:10.1002/wrna.1619
- 763 Jeong K-W, Uzun Ü, Selmer M, Ehrenberg M. 2016. Two proofreading steps amplify the  
764 accuracy of genetic code translation. *Proc Natl Acad Sci USA* **113**:13744–13749.  
765 doi:10.1073/pnas.1610917113



- 766 Juette MF, Terry DS, Wasserman MR, Altman RB, Zhou Z, Zhao H, Blanchard SC. 2016.  
767 Single-molecule imaging of non-equilibrium molecular ensembles on the millisecond  
768 timescale. *Nat Methods* **13**:341–344. doi:10.1038/nmeth.3769
- 769 Kimanius D, Dong L, Sharov G, Nakane T, Scheres SHW. 2021. New tools for automated cryo-  
770 EM single-particle analysis in RELION-4.0. *Biochem J* **478**:4169–4185.  
771 doi:10.1042/BCJ20210708
- 772 Kimanius D, Forsberg BO, Scheres SH, Lindahl E. 2016. Accelerated cryo-EM structure  
773 determination with parallelisation using GPUs in RELION-2. *eLife* **5**:e18722.  
774 doi:10.7554/eLife.18722
- 775 Klein VG, Bray WM, Wang H-Y, Edmondson Q, Schwochert J, Ono S, Naylor MR, Turmon AC,  
776 Faris JH, Okada O, Taunton J, Lokey RS. 2021. Identifying the cellular target of  
777 cordyheptapeptide A and synthetic derivatives. *ACS Chem Biol* **16**:1354–1364.  
778 doi:10.1021/acscchembio.1c00094
- 779 Krastel P, Roggo S, Schirle M, Ross NT, Perruccio F, Aspesi P, Aust T, Buntin K, Estoppey D,  
780 Liechty B, Mapa F, Memmert K, Miller H, Pan X, Riedl R, Thibaut C, Thomas J, Wagner T,  
781 Weber E, Xie X, Hoepfner D. 2015. Nannocystin A: an Elongation Factor 1 Inhibitor from  
782 Myxobacteria with Differential Anti-Cancer Properties. *Angew Chem Int Ed* **54**:10149–10154.  
783 doi:10.1002/anie.201505069
- 784 Kucuk O, Young ML, Habermann TM, Wolf BC, Jimeno J, Cassileth PA. 2000. Phase II trial of  
785 didemnin B in previously treated non-Hodgkin's lymphoma: an Eastern Cooperative Oncology  
786 Group (ECOG) Study. *Am J Clin Oncol* **23**:273–277. doi:10.1097/00000421-200006000-  
787 00013
- 788 Lindqvist L, Robert F, Merrick W, Kakeya H, Fraser C, Osada H, Pelletier J. 2010. Inhibition of  
789 translation by cytotrienin A--a member of the ansamycin family. *RNA* **16**:2404–2413.  
790 doi:10.1261/rna.2307710
- 791 Li X, Mooney P, Zheng S, Booth CR, Braunfeld MB, Gubbens S, Agard DA, Cheng Y. 2013.  
792 Electron counting and beam-induced motion correction enable near-atomic-resolution single-  
793 particle cryo-EM. *Nat Methods* **10**:584–590. doi:10.1038/nmeth.2472
- 794 McKinney SA, Joo C, Ha T. 2006. Analysis of single-molecule FRET trajectories using hidden  
795 Markov modeling. *Biophys J* **91**:1941–1951. doi:10.1529/biophysj.106.082487
- 796 McMahon M, Contreras A, Holm M, Uechi T, Forester CM, Pang X, Jackson C, Calvert ME,  
797 Chen B, Quigley DA, Luk JM, Kelley RK, Gordan JD, Gill RM, Blanchard SC, Ruggero D.  
798 2019. A single H/ACA small nucleolar RNA mediates tumor suppression downstream of  
799 oncogenic RAS. *eLife* **8**. doi:10.7554/eLife.48847
- 800 Mittelman A, Chun HG, Puccio C, Coombe N, Lansen T, Ahmed T. 1999. Phase II clinical trial of  
801 didemnin B in patients with recurrent or refractory anaplastic astrocytoma or glioblastoma  
802 multiforme (NSC 325319). *Invest New Drugs* **17**:179–182.
- 803 Morse JC, Girodat D, Burnett BJ, Holm M, Altman RB, Sanbonmatsu KY, Wieden H-J,  
804 Blanchard SC. 2020. Elongation factor-Tu can repetitively engage aminoacyl-tRNA within the  
805 ribosome during the proofreading stage of tRNA selection. *Proc Natl Acad Sci USA*  
806 **117**:3610–3620. doi:10.1073/pnas.1904469117
- 807 Munro JB, Altman RB, O'Connor N, Blanchard SC. 2007. Identification of two distinct hybrid  
808 state intermediates on the ribosome. *Mol Cell* **25**:505–517. doi:10.1016/j.molcel.2007.01.022

- 809 Natchiar SK, Myasnikov AG, Kratzat H, Hazemann I, Klaholz BP. 2017. Visualization of  
810 chemical modifications in the human 80S ribosome structure. *Nature* **551**:472–477.  
811 doi:10.1038/nature24482
- 812 Noller HF, Lancaster L, Zhou J, Mohan S. 2017. The ribosome moves: RNA mechanics and  
813 translocation. *Nat Struct Mol Biol* **24**:1021–1027. doi:10.1038/nsmb.3505
- 814 O’Hare T, Eide CA, Agarwal A, Adrian LT, Zabriskie MS, Mackenzie RJ, Latocha DH, Johnson  
815 KJ, You H, Luo J, Riddle SM, Marks BD, Vogel KW, Koop DR, Apgar J, Tyner JW, Deininger  
816 MW, Druker BJ. 2013. Threshold levels of ABL tyrosine kinase inhibitors retained in chronic  
817 myeloid leukemia cells determine their commitment to apoptosis. *Cancer Res* **73**:3356–3370.  
818 doi:10.1158/0008-5472.CAN-12-3904
- 819 Pellegrino S, Meyer M, Könst ZA, Holm M, Voora VK, Kashinskaya D, Zanette C, Mobley DL,  
820 Yusupova G, Vanderwal CD, Blanchard SC, Yusupov M. 2019. Understanding the role of  
821 intermolecular interactions between lissoclimides and the eukaryotic ribosome. *Nucleic Acids*  
822 *Res* **47**:3223–3232. doi:10.1093/nar/gkz053
- 823 Pettersen EF, Goddard TD, Huang CC, Couch GS, Greenblatt DM, Meng EC, Ferrin TE. 2004.  
824 UCSF Chimera—a visualization system for exploratory research and analysis. *J Comput*  
825 *Chem* **25**:1605–1612. doi:10.1002/jcc.20084
- 826 Pettersen EF, Goddard TD, Huang CC, Meng EC, Couch GS, Croll TI, Morris JH, Ferrin TE.  
827 2021. UCSF ChimeraX: structure visualization for researchers, educators, and developers.  
828 *Protein Sci* **30**:70–82. doi:10.1002/pro.3943
- 829 Prokhorova I, Altman RB, Djumagulov M, Shrestha JP, Urzhumtsev A, Ferguson A, Chang C-  
830 WT, Yusupov M, Blanchard SC, Yusupova G. 2017. Aminoglycoside interactions and impacts  
831 on the eukaryotic ribosome. *Proc Natl Acad Sci USA* **114**:E10899–E10908.  
832 doi:10.1073/pnas.1715501114
- 833 Qin F. 2004. Restoration of single-channel currents using the segmental k-means method  
834 based on hidden Markov modeling. *Biophys J* **86**:1488–1501. doi:10.1016/S0006-  
835 3495(04)74217-4
- 836 Rohou A, Grigorieff N. 2015. CTFFIND4: Fast and accurate defocus estimation from electron  
837 micrographs. *J Struct Biol* **192**:216–221. doi:10.1016/j.jsb.2015.08.008
- 838 Rosenthal PB, Henderson R. 2003. Optimal determination of particle orientation, absolute hand,  
839 and contrast loss in single-particle electron cryomicroscopy. *J Mol Biol* **333**:721–745.  
840 doi:10.1016/j.jmb.2003.07.013
- 841 Rundlet EJ, Holm M, Schacherl M, Natchiar SK, Altman RB, Spahn CMT, Myasnikov AG,  
842 Blanchard SC. 2021. Structural basis of early translocation events on the ribosome. *Nature*  
843 **595**:741–745. doi:10.1038/s41586-021-03713-x
- 844 Sánchez-Murcia PA, Cortés-Cabrera Á, Gago F. 2017. Structural rationale for the cross-  
845 resistance of tumor cells bearing the A399V variant of elongation factor eEF1A1 to the  
846 structurally unrelated didemnin B, ternatin, nannocystin A and ansatrienin B. *J Comput Aided*  
847 *Mol Des* **31**:915–928. doi:10.1007/s10822-017-0066-x
- 848 Scheres SHW. 2015. Semi-automated selection of cryo-EM particles in RELION-1.3. *J Struct*  
849 *Biol* **189**:114–122. doi:10.1016/j.jsb.2014.11.010
- 850 Schmeing TM, Voorhees RM, Kelley AC, Gao Y-G, Murphy FV, Weir JR, Ramakrishnan V.  
851 2009. The crystal structure of the ribosome bound to EF-Tu and aminoacyl-tRNA. *Science*  
852 **326**:688–694. doi:10.1126/science.1179700

- 853 Shao S, Murray J, Brown A, Taunton J, Ramakrishnan V, Hegde RS. 2016. Decoding  
854 Mammalian Ribosome-mRNA States by Translational GTPase Complexes. *Cell* **167**:1229-  
855 1240.e15. doi:10.1016/j.cell.2016.10.046
- 856 Sharma A, Mariappan M, Appathurai S, Hegde RS. 2010. In vitro dissection of protein  
857 translocation into the mammalian endoplasmic reticulum. *Methods Mol Biol* **619**:339–363.  
858 doi:10.1007/978-1-60327-412-8\_20
- 859 Suloway C, Pulokas J, Fellmann D, Cheng A, Guerra F, Quispe J, Stagg S, Potter CS,  
860 Carragher B. 2005. Automated molecular microscopy: the new Leginon system. *J Struct Biol*  
861 **151**:41–60. doi:10.1016/j.jsb.2005.03.010
- 862 Sun C, Liu R, Xia M, Hou Y, Wang X, Lu J-J, Liu B, Chen X. 2021. Nannocystin Ax, a natural  
863 elongation factor 1 $\alpha$  inhibitor from *Nannocystis* sp., suppresses epithelial-mesenchymal  
864 transition, adhesion and migration in lung cancer cells. *Toxicol Appl Pharmacol* **420**:115535.  
865 doi:10.1016/j.taap.2021.115535
- 866 Taylor SA, Giroux DJ, Jaeckle KA, Panella TJ, Dakhil SR, Schold SC. 1998. Phase II study of  
867 Didemnin B in central nervous system tumors: a Southwest Oncology Group study. *Invest*  
868 *New Drugs* **16**:331–332. doi:10.1023/a:1006273214056
- 869 Vera MD, Joullié MM. 2002. Natural products as probes of cell biology: 20 years of didemnin  
870 research. *Med Res Rev* **22**:102–145. doi:10.1002/med.10003
- 871 Voorhees RM, Schmeing TM, Kelley AC, Ramakrishnan V. 2010. The mechanism for activation  
872 of GTP hydrolysis on the ribosome. *Science* **330**:835–838. doi:10.1126/science.1194460
- 873 Wang H-Y, Oltion K, Al-Khhdhairawi AAQ, Weber J-FF, Taunton J. 2020. Total synthesis and  
874 biological characterization of SR-A3, a ternatin-related eEF1A inhibitor with enhanced cellular  
875 residence time. *BioRxiv*. doi:10.1101/2020.10.06.325498
- 876 White KM, Rosales R, Yildiz S, Kehrer T, Miorin L, Moreno E, Jangra S, Uccellini MB,  
877 Rathnasinghe R, Coughlan L, Martinez-Romero C, Batra J, Rojc A, Bouhaddou M, Fabius JM,  
878 Obernier K, Dejoze M, Guillén MJ, Losada A, Avilés P, García-Sastre A. 2021. Plitidepsin  
879 has potent preclinical efficacy against SARS-CoV-2 by targeting the host protein eEF1A.  
880 *Science* **371**:926–931. doi:10.1126/science.abf4058
- 881 Whitford PC, Geggier P, Altman RB, Blanchard SC, Onuchic JN, Sanbonmatsu KY. 2010.  
882 Accommodation of aminoacyl-tRNA into the ribosome involves reversible excursions along  
883 multiple pathways. *RNA* **16**:1196–1204. doi:10.1261/rna.2035410
- 884 Wieczorek M, Tcherkezian J, Bernier C, Prota AE, Chaaban S, Rolland Y, Godbout C, Hancock  
885 MA, Arezzo JC, Ocal O, Rocha C, Olieric N, Hall A, Ding H, Bramoullé A, Annis MG,  
886 Zogopoulos G, Harran PG, Wilkie TM, Brekken RA, Roulston A. 2016. The synthetic  
887 diazonamide DZ-2384 has distinct effects on microtubule curvature and dynamics without  
888 neurotoxicity. *Sci Transl Med* **8**:365ra159. doi:10.1126/scitranslmed.aag1093
- 889 Williamson SK, Wolf MK, Eisenberger MA, O'Rourke M, Brannon W, Crawford ED. 1995. Phase  
890 II evaluation of didemnin B in hormonally refractory metastatic prostate cancer. A Southwest  
891 Oncology Group study. *Invest New Drugs* **13**:167–170. doi:10.1007/BF00872867
- 892 Xu Y, Ruggero D. 2020. The role of translation control in tumorigenesis and its therapeutic  
893 implications. *Annu Rev Cancer Biol* **4**. doi:10.1146/annurev-cancerbio-030419-033420
- 894 Yan K, Rawle DJ, Le TT, Suhrbier A. 2021. Simple rapid in vitro screening method for SARS-  
895 CoV-2 anti-virals that identifies potential cytotoxicity-associated false positives. *Virology*  
896 **18**:123. doi:10.1186/s12985-021-01587-z

897 Zhang K. 2016. Gctf: Real-time CTF determination and correction. *J Struct Biol* **193**:1–12.  
898 doi:10.1016/j.jsb.2015.11.003

899

900

901

902

903

904

905

906

907

908

909

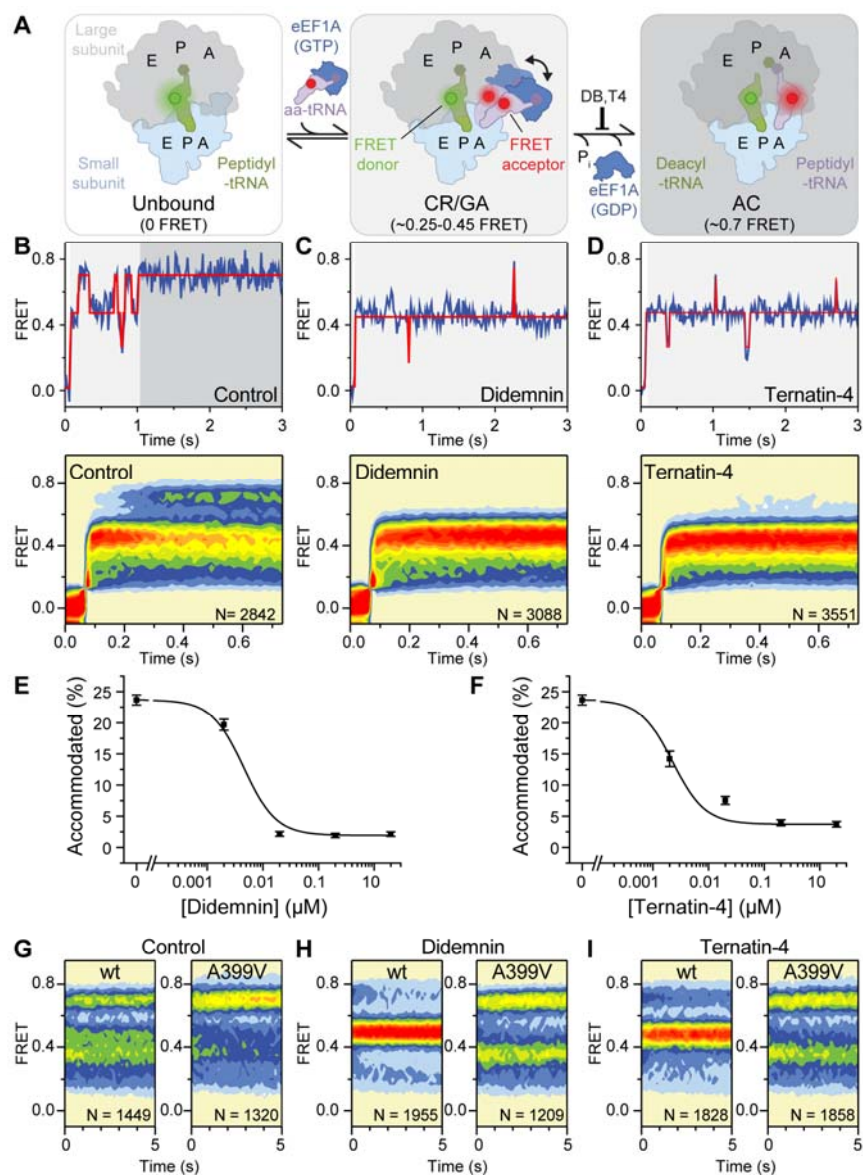

910  
 911 **Figure 1. Mechanism of didemnin and ternatin-4 inhibition revealed by smFRET.**  
 912 (A) Schematic of the experimental setup. Acceptor Cy5-labeled eEF1A(GTP)-aa-tRNA ternary  
 913 complex is delivered to 80S initiation complexes with donor Cy3-labeled P-site tRNA (left).  
 914 Codon recognition (CR; low FRET) leads to a pre-accommodated GTPase-activated (GA), mid-  
 915 FRET state (center). Accommodation (AC) and peptide-bond formation produce a pre-  
 916 translocation complex (right), which samples classical (high-FRET) and hybrid (mid-FRET)  
 917 conformations in equilibrium. (B-D, top) Representative smFRET traces and (bottom) post-  
 918 synchronized population histograms of N traces of accommodation dynamics of pre-steady  
 919 state reactions in the presence of (B) DMSO (control) or 20 μM (C) didemnin or (D) ternatin-4.  
 920 Shading behind traces and histograms indicates the predominant state assignment as  
 921 described in (A; white, unbound; light gray, CR/GA; dark gray, accommodated). (E, F) Dose-  
 922 response curves of the accommodated fraction in the presence of (E) didemnin or (F) ternatin-4.  
 923 Error bars: s.e.m. from 1000 bootstrap samples. (G-I) Population histograms of N traces for  
 924 steady-state reactions, formed with ternary complex containing recombinant eEF1A (WT or  
 925 A399V). See also Figure 1—figure supplement 1-3.

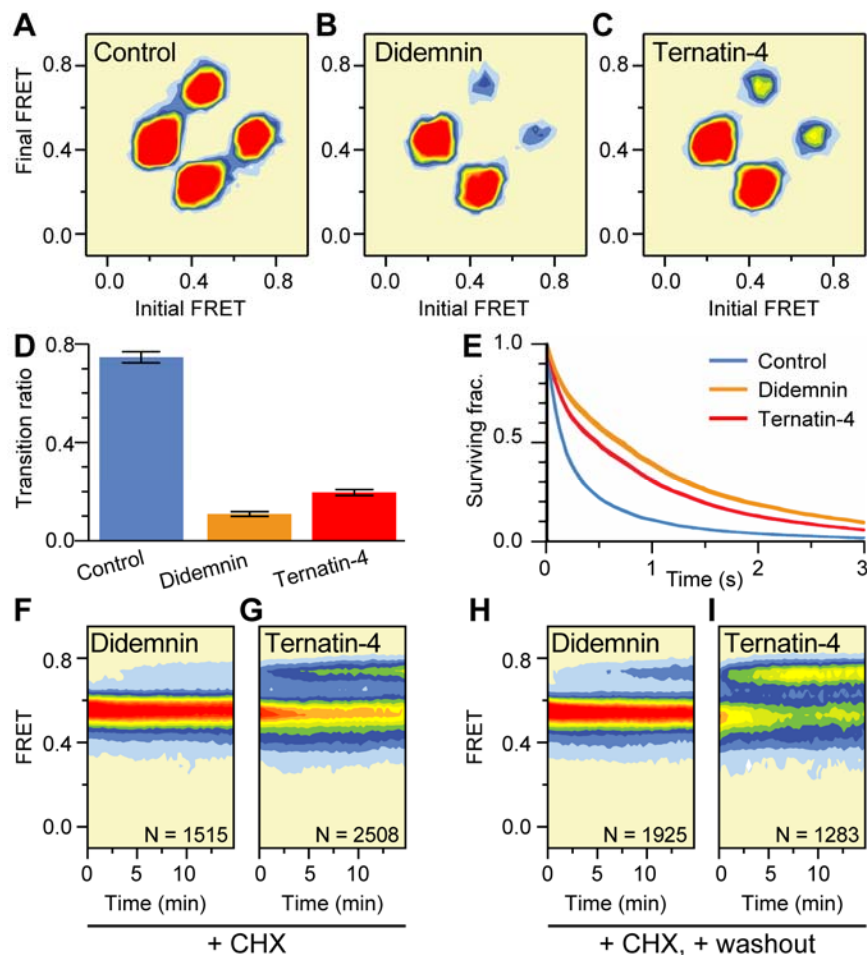

926  
927  
928  
929  
930  
931  
932  
933  
934  
935  
936  
937  
938

**Figure 2. Mechanistic differences between didemnin and ternatin-4.**

(A-C) Transition density plots of pre-accommodated complexes reveal attenuated sampling of the high-FRET (accommodated) state comparing (A) absence of drug, or in the presence of saturating (20  $\mu$ M) (B) didemnin or (C) ternatin-4. (D) Ratio of mid-to-high over mid-to-low transitions. Error bars: s.e.m. from 1000 bootstrap samples. (E) Survival plots reveal increased mid-FRET (GA) lifetimes with didemnin and ternatin-4 (line width = s.e.m. from 1000 bootstrap samples). (F, G) Population histograms of N traces after extended incubation in the presence of cycloheximide (CHX) and 20  $\mu$ M (F) didemnin or (G) ternatin-4 reveals “sneak-through” to high-FRET pre-translocation complexes. (H) Didemnin/CHX- or (I) ternatin-4/CHX-stalled complexes were washed in the presence of CHX in the first second of each movie, revealing aa-tRNA accommodation, concomitant with drug dissociation. See also Figure 2—figure supplement 1.

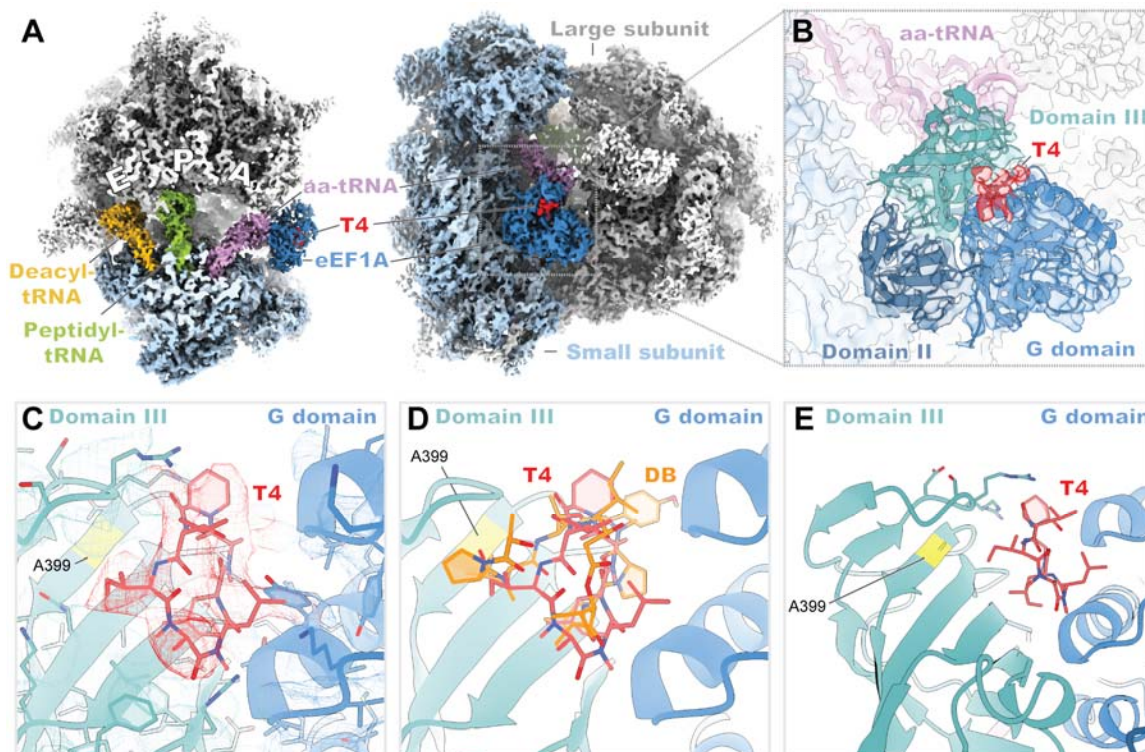

939  
940  
941  
942  
943  
944  
945  
946  
947  
948  
949  
950  
951  
952  
953  
954  
955  
956

**Figure 3. Cryo-EM structure of ternatin-4 stalled rabbit 80S-eEF1A-aa-tRNA complex.**

(A) Overview of the cryo-EM density maps of the ternatin-4-stalled rabbit elongation complex viewed from the small subunit (SSU) head domain (*left*) and into the GTPase activating center (GAC) from the leading edge (*right*) comprising the large (LSU; gray) and SSU (light blue) ribosomal subunits, peptidyl-tRNA (P site; green) and deacyl-tRNA (E site; gold), aminoacyl-tRNA in the pre-accommodated A/T state (aa-tRNA; purple), eEF1A (blue), and ternatin-4 (T4; red). (B) Cryo-EM density of eEF1A ternary complex on the ribosome highlighting density for T4 (red), with eEF1A colored by domain. Molecular model of eEF1A and aa-tRNA (purple) from PDB-ID: 5LZS (Shao et al., 2016) was rigid-body fit into the cryo-EM map. (C) Zoom-in of cryo-EM density at the interface between the G domain and domain III of eEF1A that has been assigned to T4 (red), colored as in (B). Residue A399 (yellow), which confers resistance to didemnin (DB) and T4 and when mutated to valine, is adjacent to the density for T4. (D) Overlay of molecular models of DB (orange) and T4 (red) from the same camera angle as (C). (E) View of the DB and T4 binding pocked on eEF1A, highlighting the site of a resistance mutation (A399; yellow) and the 375-391 loop of domain III between  $\beta$ 15-16. All cryo-EM density is contoured at  $3.5 \sigma$ . See also Figure 3—figure supplement 1-4.

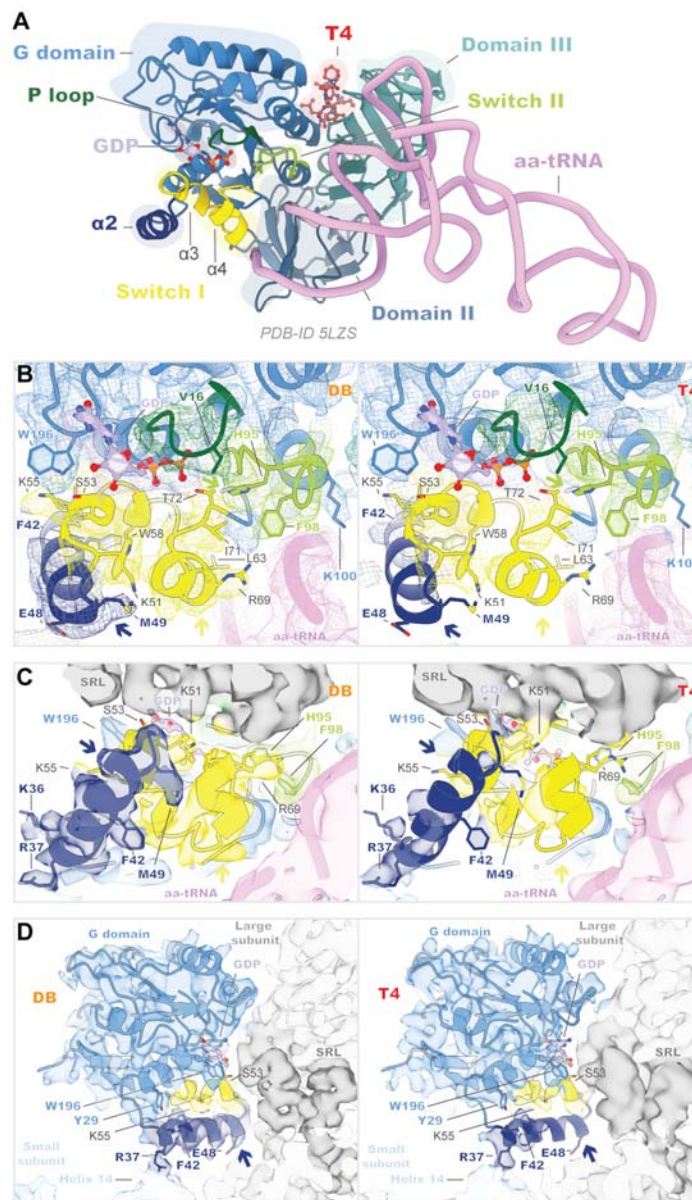

957  
 958 **Figure 4. eEF1A is more dynamic when bound to ternatin-4 than to didemnin.**  
 959 (A) Overview of the domain architecture of the eEF1A ternary complex from PDB-ID: 5LZS  
 960 (Shao et al., 2016) bound to ternatin-4 (T4; red) as viewed from the leading edge of the rabbit  
 961 80S ribosome and the Sarcin ricin loop (SRL). G-domain (blue) elements include switch I  
 962 (yellow), switch II (lime), the P loop (dark green), helix  $\alpha 2$  (dark blue), and a bound GDP (light  
 963 purple) in the nucleotide binding pocket. (B-D) Molecular models from PDB-ID: 5LZS (Shao et  
 964 al., 2016) were rigid-body fit into the cryo-EM density shown in (B) mesh and (C, D) surface  
 965 representation of the eEF1A G domain when stalled with didemnin (DB; orange; EMD-4130;  
 966 *left*) (Shao et al., 2016) or T4 (*right*) on the elongating rabbit 80S ribosome, colored as in (A).  
 967 Colored arrows indicate regions of weakened cryo-EM density in the T4-stalled eEF1A G  
 968 domain in the C terminus of helix  $\alpha 2$  (dark blue), the C terminus of switch I (yellow) and the  
 969 catalytic His95 of switch II (lime). Panels highlight (B) the nucleotide binding pocket of eEF1A  
 970 and switch loop architecture, (C) the interface between eEF1A and the SRL (dark gray), and (D)  
 971 the junction between the SRL, eEF1A helix  $\alpha 2$ , and small subunit (SSU; light blue) rRNA helix  
 972 14. All cryo-EM density is contoured at  $3\sigma$ . See also Figure 4—figure supplement 1.



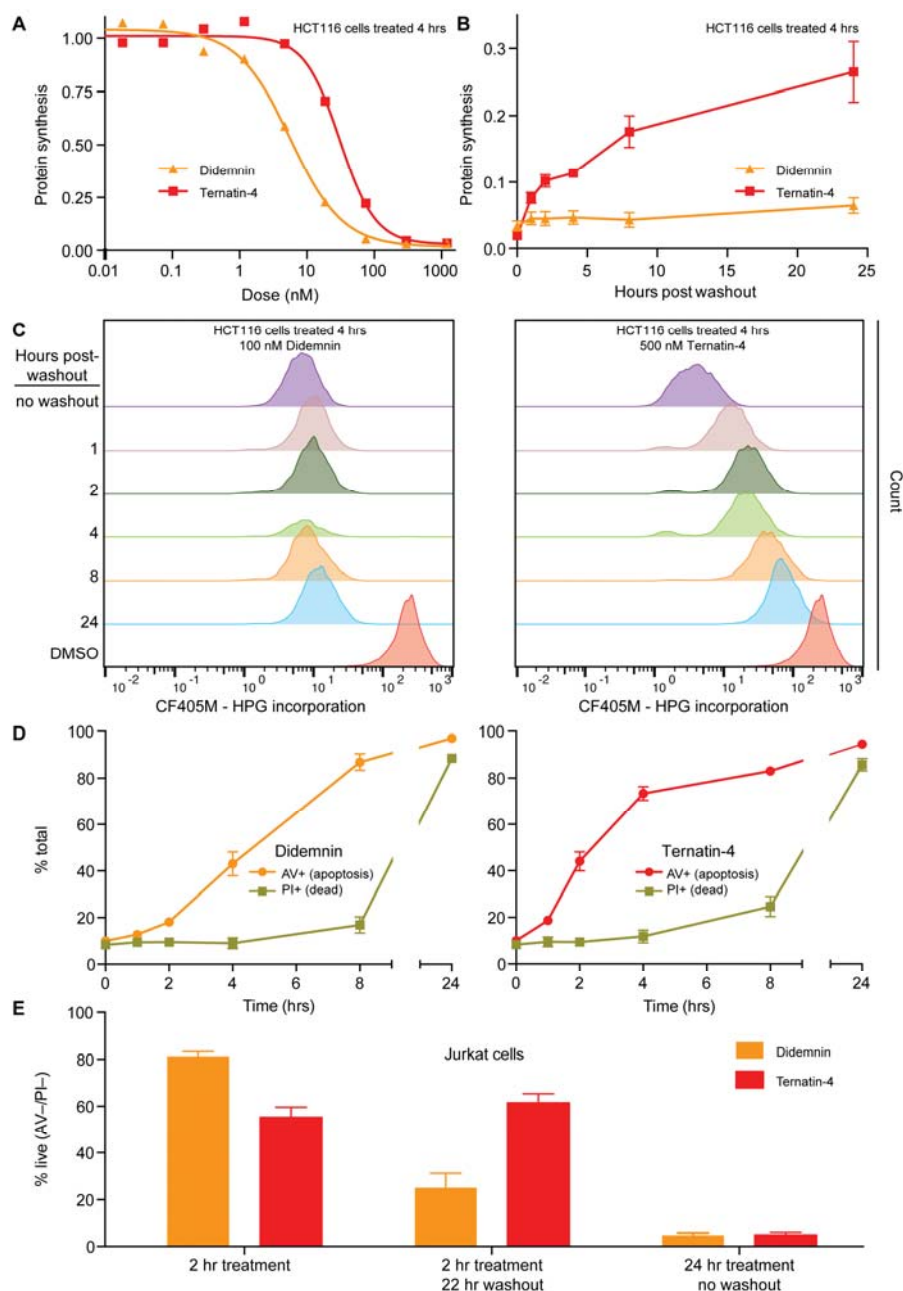

973  
974 **Figure 5. Cellular effects of ternatin-4, but not didemnin, are reversible upon washout.**

975 (A) Dose-dependent effects of didemnin (orange) and ternatin-4 (red) on protein synthesis in  
976 HCT116 cells under continuous treatment (4 hours). Protein synthesis was quantified by  
977 homopropargylglycine pulse (1 hr) followed by fixation and copper-mediated conjugation to  
978 CF405M azide fluorophore and analyzed by FACS. (B) HCT116 cells were treated with  
979 didemnin (100 nM; orange) or ternatin-4 (500 nM, red) for 4 hours, followed by washout. Protein  
980 synthesis was quantified as in (A) at 1, 2-, 4-, 8-, or 24-hours post-washout. (C) Histograms  
981 corresponding to panel (B) for didemnin (*left*) and ternatin-4 (*right*). (D) Jurkat cells were treated  
982 with didemnin (100 nM, *left*) or ternatin-4 (500 nM; *right*) or for 1, 2, 4, 8, or 24 hours, stained  
983 with Annexin V-FITC (AV) and propidium iodide (PI; green), and analyzed by FACS. (E) Jurkat  
984 cells were treated with didemnin (100 nM; orange) or ternatin-4 (500 nM; red) for 2 hours  
985 followed by washout and 22-hour incubation in drug-free media or for 24 hours and analyzed as  
986 in (D). See also Figure 5—figure supplement 1.

987

988

989

990

991

992

Supplement for:

993 **Didemnin B and ternatin-4 inhibit conformational changes in eEF1A required for**

994 **aminoacyl-tRNA accommodation into mammalian ribosomes**

995

996

997

998 **This PDF file includes:**

999 Figure 1—figure supplement 1-3

1000 Figure 2—figure supplement 1

1001 Figure 3—figure supplement 1-4

1002 Figure 4—figure supplement 1

1003 Figure 5—figure supplement 1

1004 Tables S1 and S2

1005

1006

1007

1008

1009

1010

1011

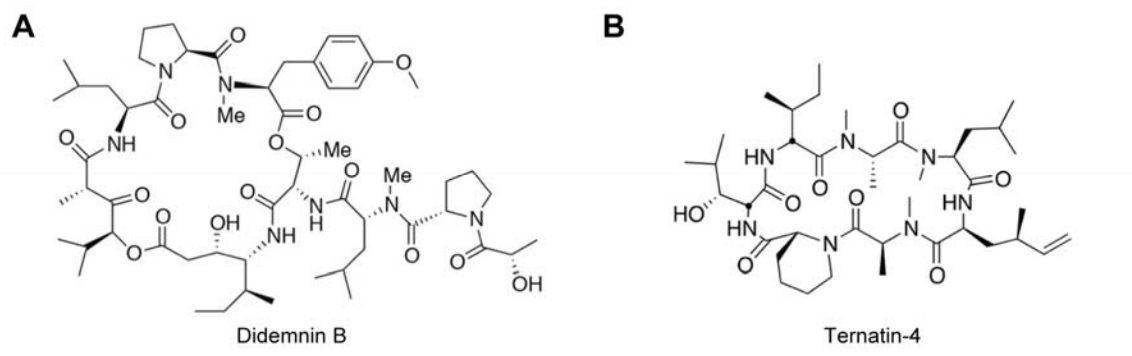

1012  
1013  
1014  
1015  
1016  
1017  
1018  
1019  
1020  
1021  
1022  
1023  
1024  
1025  
1026  
1027  
1028  
1029

**Figure 1—figure supplement 1.** Molecular structures of (A) didemnin (didemnin B) and (B) ternatin-4.

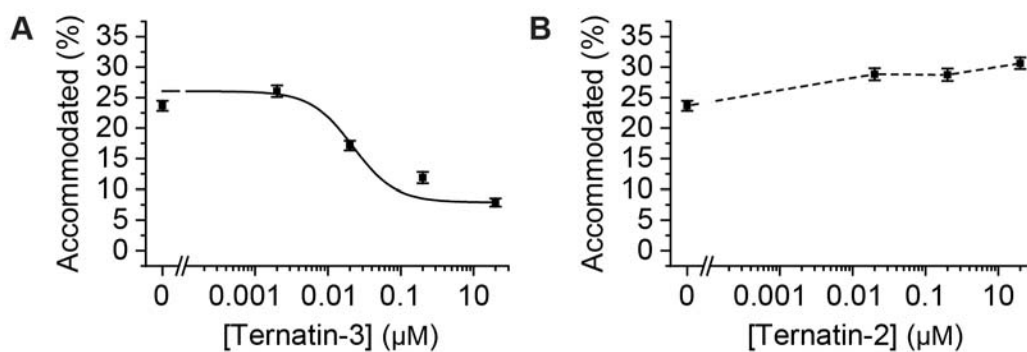

1030  
1031  
1032  
1033  
1034

**Figure 1—figure supplement 2.** Dose response profiles of the accommodated fraction for (A) intermediately active ternatin-3, and (B) inactive ternatin-2. Error bars: s.e.m. from 1000 bootstrap samples.

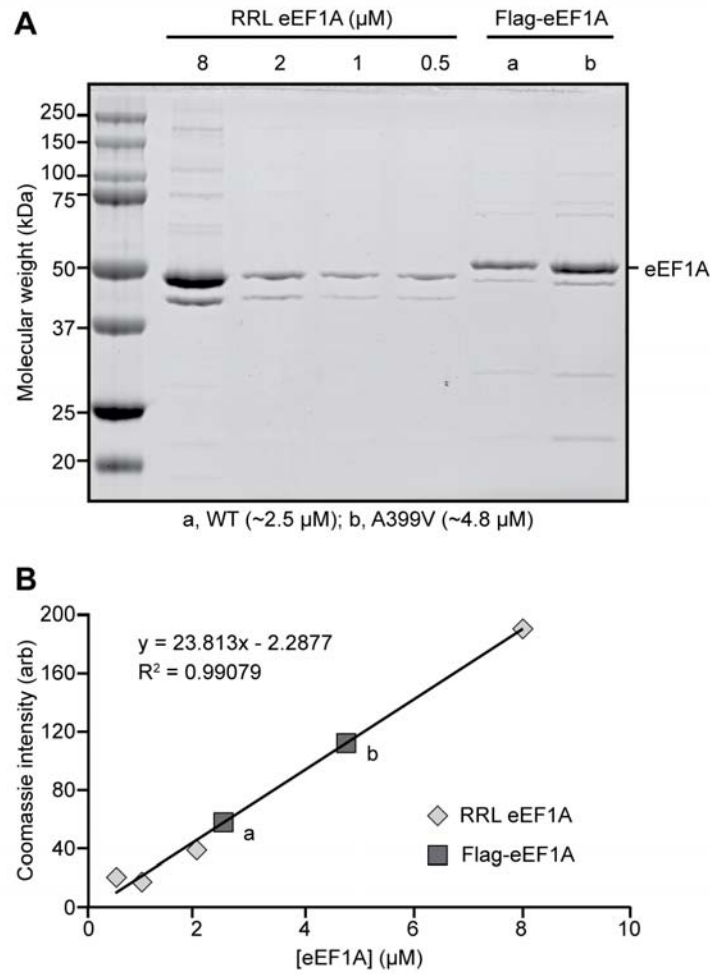

1035  
1036  
1037  
1038  
1039

**Figure 1—figure supplement 3. (A)** Coomassie-stained SDS-PAGE gel loaded with rabbit reticulocyte lysate (RRL) eEF1A (*left*) and wild type (WT; a) or mutant (A399V; b) recombinant Flag-eEF1A (*right*) and **(B)** corresponding concentration calibration plot.

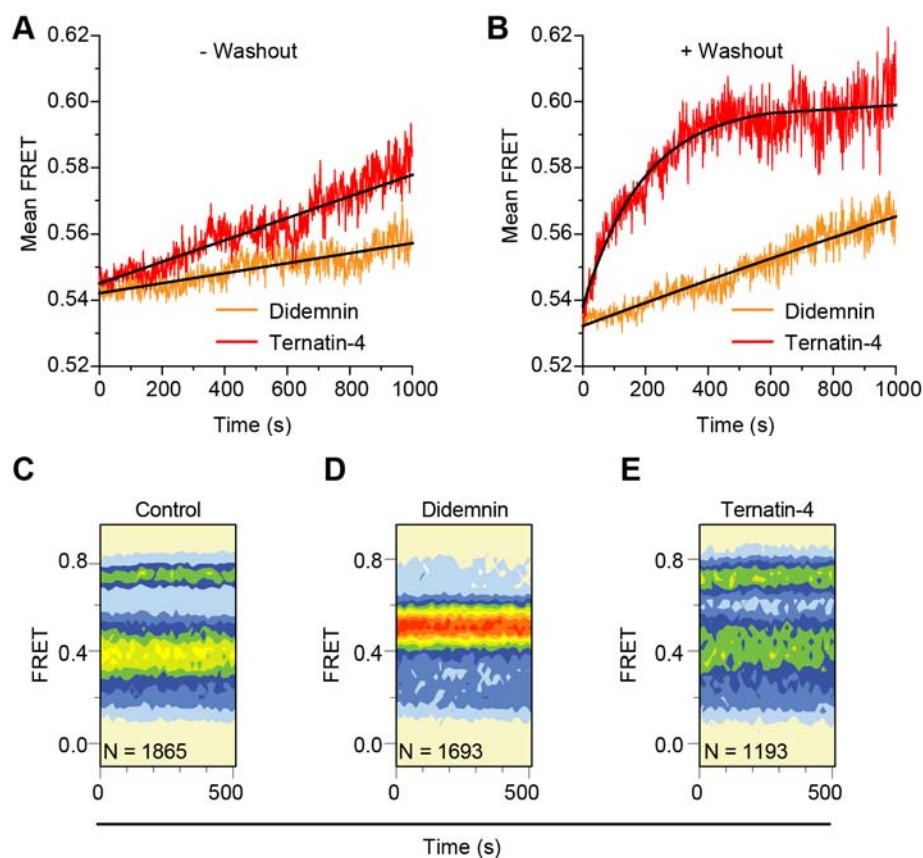

1040  
1041  
1042  
1043  
1044  
1045  
1046  
1047  
1048  
1049  
1050  
1051  
1052  
1053  
1054  
1055

**Figure 2—figure supplement 1.** (A, B) Time course of accommodation in the presence of 350  $\mu$ M cycloheximide (A) with 20  $\mu$ M didemnin (orange) or ternatin-4 (red) in solution (black line: linear fits) and (B) after washing out free drug from stalled complexes (black line: exponential fits). (C-E) Equilibrium population histograms of N traces of (C) drug-free pre-translocation complex, (D) didemnin- or (E) ternatin-4-stalled complexes 5 minutes after washout.

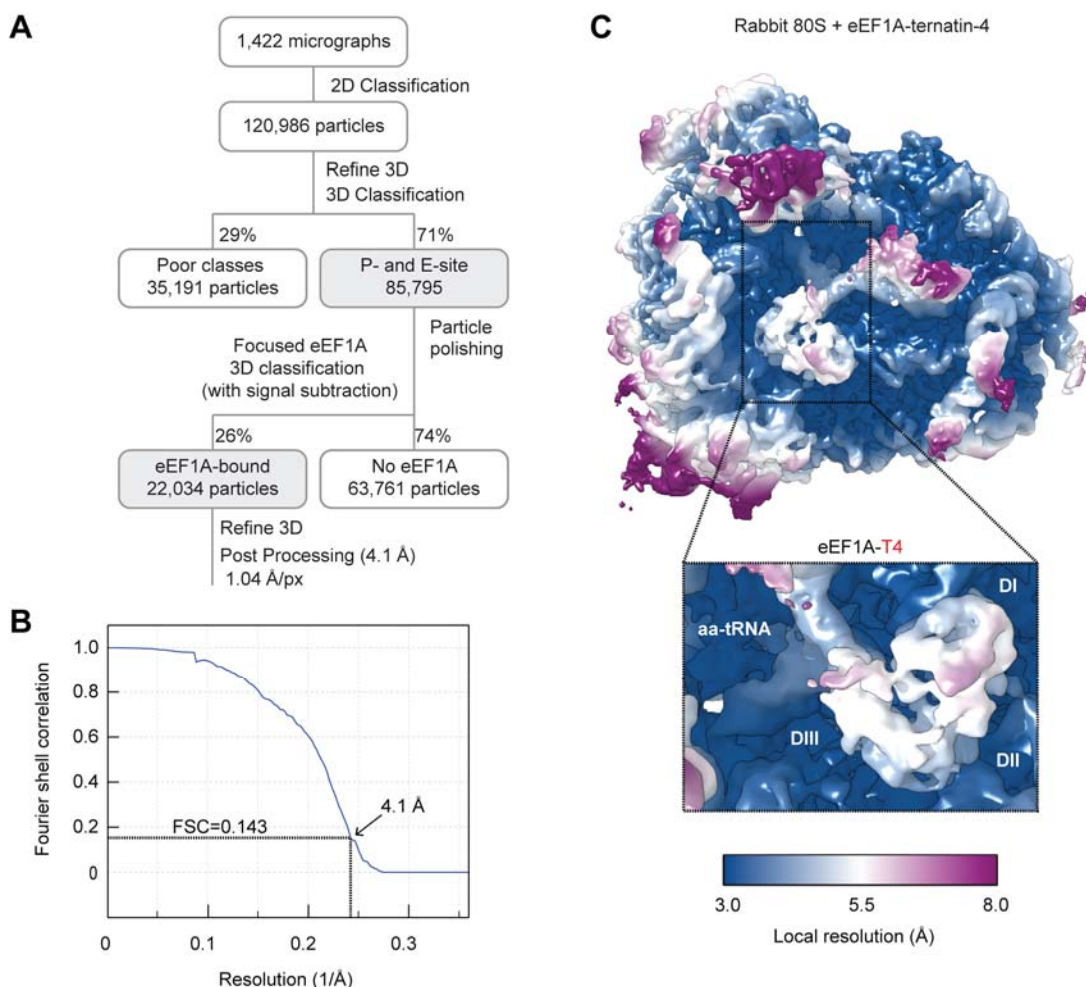

1056  
1057 **Figure 3—figure supplement 1. Cryo-EM processing of the ternatin-4 stalled rabbit 80S-**  
1058 **eEF1A-aa-tRNA structure.** (A) Flowchart of cryo-EM image processing. (B) Fourier Shell  
1059 Correlation (FSC) curve for the final reconstruction. Based on the FSC = 0.143 criterion the map  
1060 reaches a nominal resolution of 4.1 Å. (C) Local resolution of refined map showing an overview  
1061 and eEF1A (*inlay*). The local resolution for the eEF1A(GDP)-aa-tRNA ternary complex is lower  
1062 than the surrounding ribosome due to flexibility.

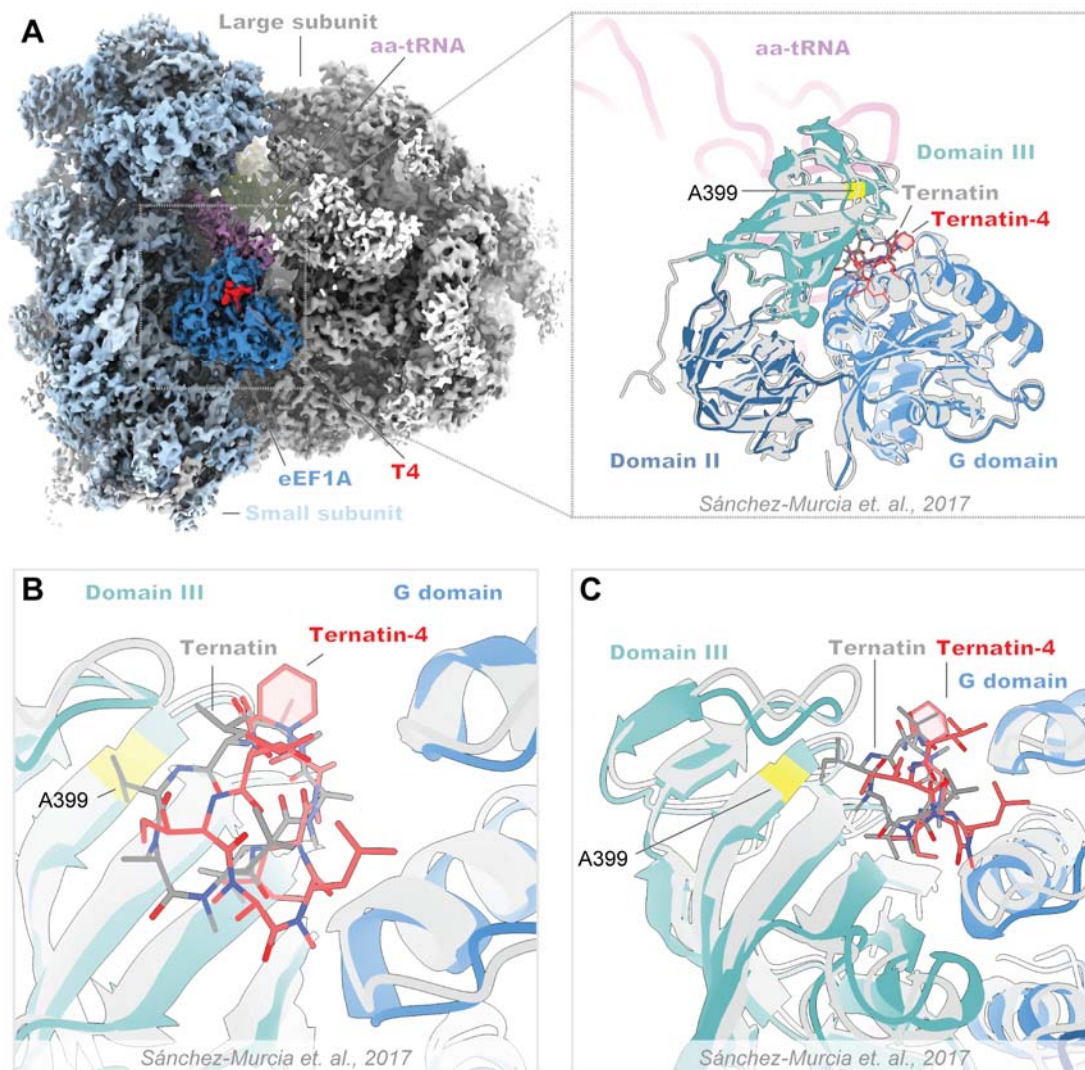

1063  
1064  
1065  
1066  
1067  
1068  
1069  
1070  
1071  
1072  
1073  
1074  
1075  
1076

**Figure 3—figure supplement 2. Structural comparison of the ternatin-4-stalled rabbit elongation complex with a published prediction of ternatin binding.** (A) Overview of the cryo-EM density maps of the ternatin-4-stalled rabbit elongation complex (*left*) comprising the large (LSU; gray) and small (SSU; light blue) ribosomal subunits, peptidyl-tRNA (P site; green), aminoacyl-tRNA in the pre-accommodated A/T state (aa-tRNA; purple), eEF1A (blue), and ternatin-4 (T4; red). (Inlay) Molecular model of eEF1A and aa-tRNA (purple) from PDB-ID: 5LZS (Sánchez-Murcia et al., 2017), colored by domain was rigid-body fit into the cryo-EM map and aligned to a published molecular dynamics model of ternatin docked to eEF1A (gray) (Sánchez-Murcia et al., 2017). (B, C) Zoom-in of the overlay from panel (A; inlay) of the ternatin-4 binding site at the interface between the G domain and domain III of eEF1A, colored as in (A; inlay). Residue A399 (yellow), which confers resistance to ternatin and didemnin when mutated to valine, is adjacent to the density for T4.

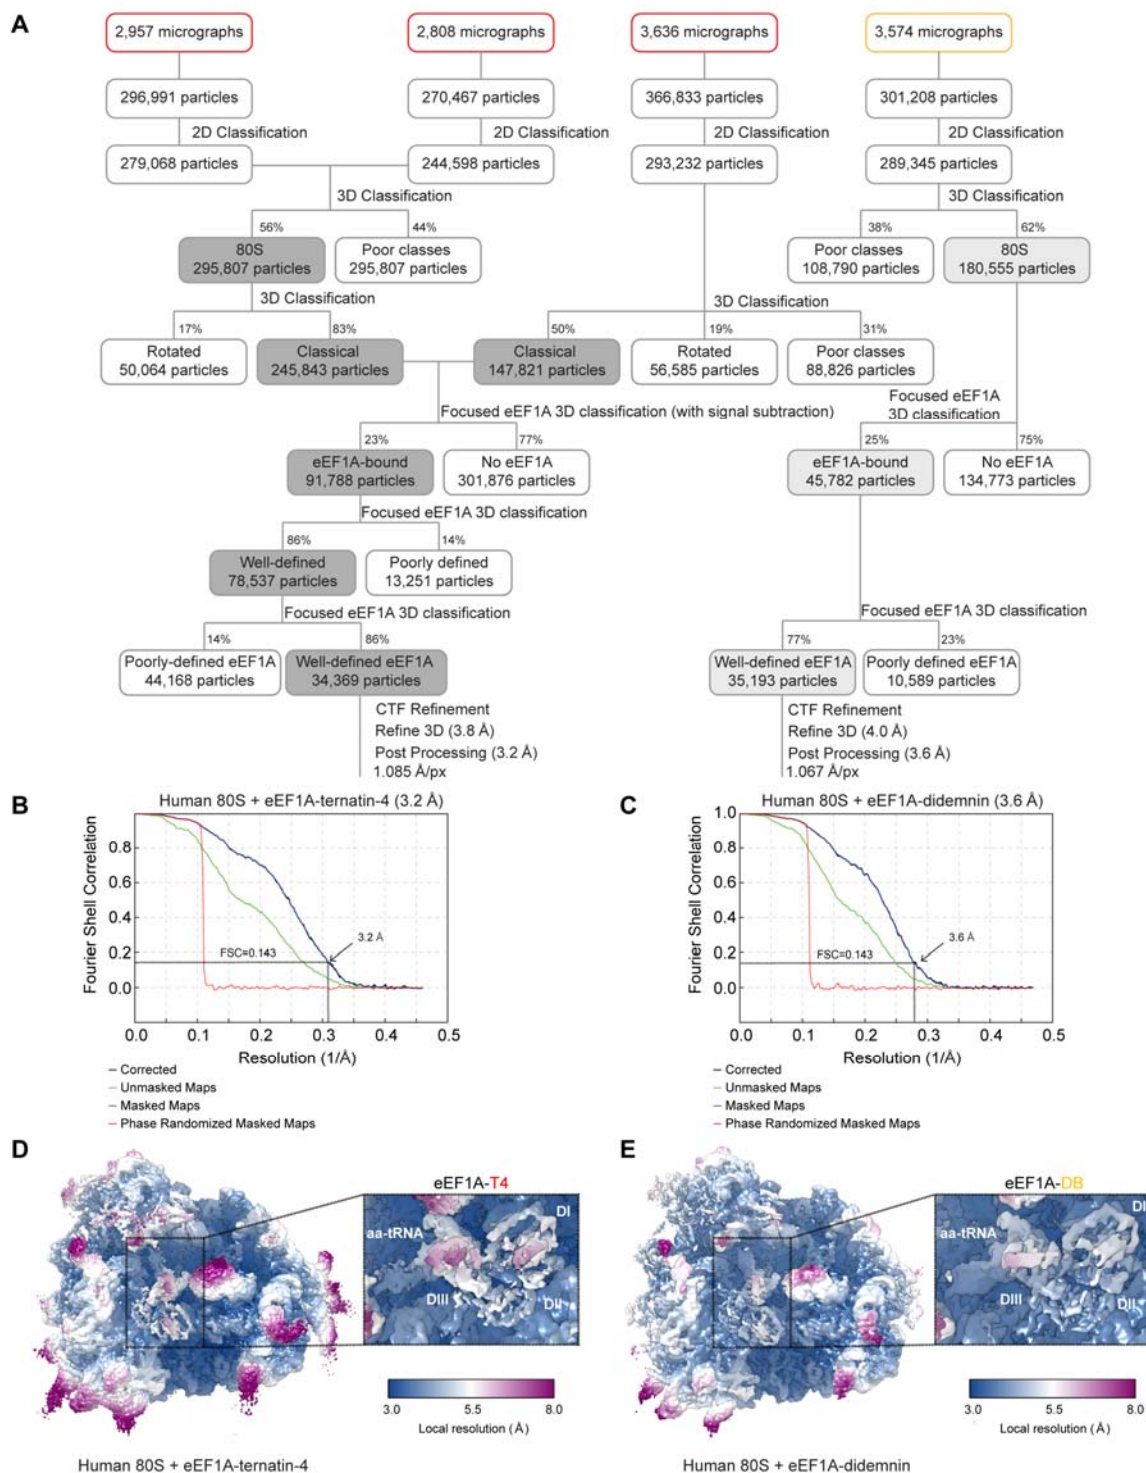

1077  
 1078 **Figure 3—figure supplement 3. Cryo-EM processing of the didemnin and ternatin-4**  
 1079 **stalled human 80S-eEF1A-aa-tRNA structures. (A)** Flowchart of cryo-EM image processing  
 1080 for final map generation for ternatin-4 (red; left) and didemnin (orange; right). **(B, C)** Fourier  
 1081 Shell Correlation (FSC) curve for the final reconstructions for **(B)** ternatin-4 and **(C)** didemnin.  
 1082 **(D, E)** Local resolution of the refined maps for **(D)** ternatin-4 (T4) and **(E)** didemnin (DB) viewing  
 1083 overview and eEF1A (*inlay*). The local resolution for the eEF1A-aa-tRNA ternary complex is  
 1084 lower than the surrounding ribosome due to flexibility.



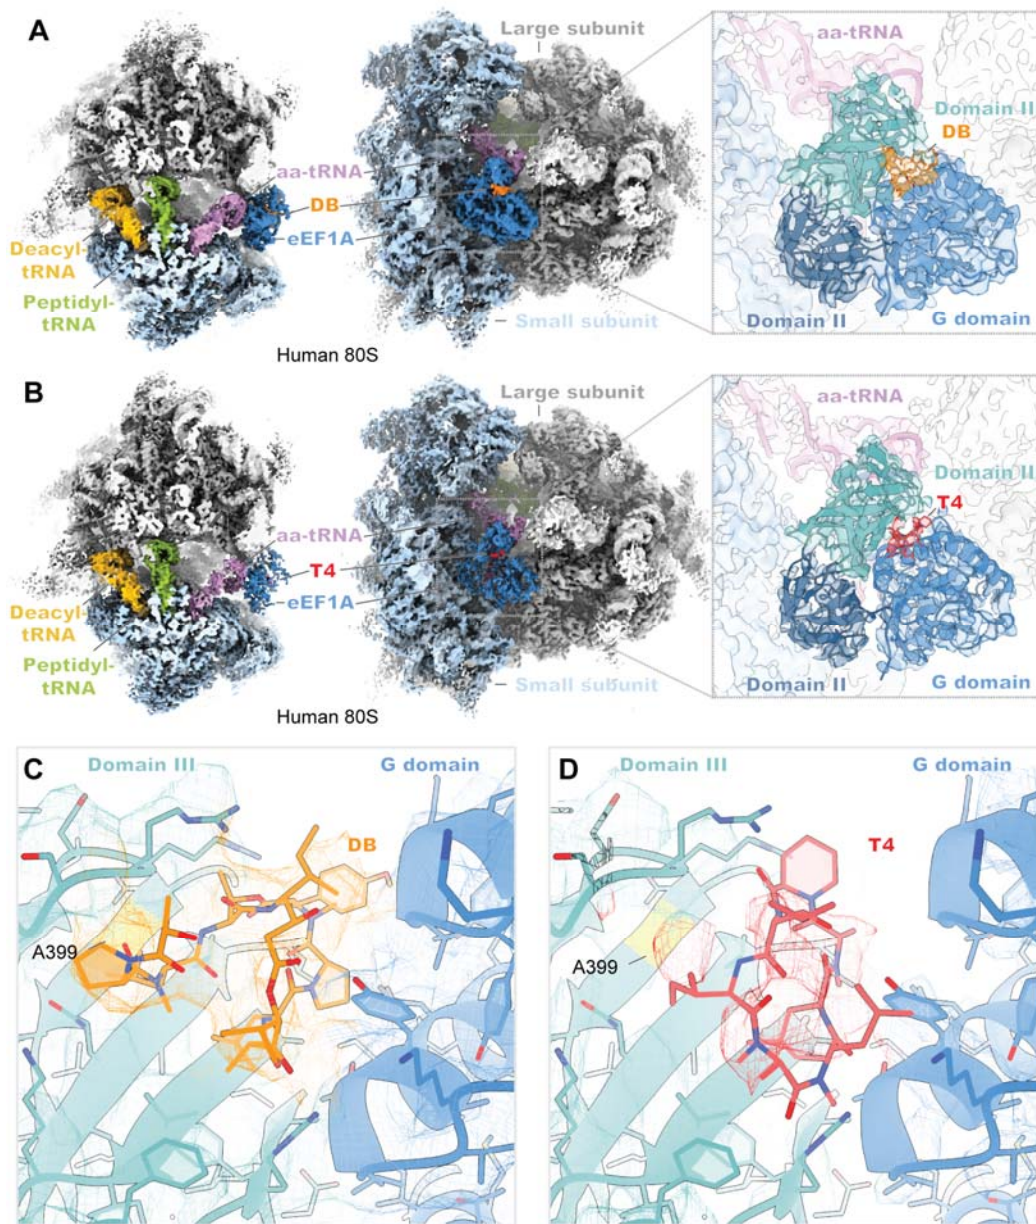

1085  
 1086 **Figure 3—figure supplement 4. Cryo-EM structures of didemnin and ternatin-4 stalled**  
 1087 **human 80S -eEF1A(aa-tRNA) complexes.** (A, B) Overview of the cryo-EM density maps of the  
 1088 (A) didemnin- and (B) ternatin-4-stalled human initiation complexes viewed from the small  
 1089 subunit (SSU) head domain (*left*) and into the GTPase activating center (GAC) from the leading  
 1090 edge (*middle*) comprising the large subunit (LSU; gray) and SSU (light blue), peptidyl-tRNA (P  
 1091 site; green) and deacyl-tRNA (E site; gold), aminoacyl-tRNA in the pre-accommodated A/T state  
 1092 (aa-tRNA; purple), eEF1A (blue), and didemnin (DB; orange) or ternatin-4 (T4; red). Inlays  
 1093 (*right*) show cryo-EM density of eEF1A ternary complex on the ribosome highlighting density for  
 1094 (A) DB or (B) T4, with eEF1A colored by domain. Molecular model of eEF1A and aa-tRNA from  
 1095 PDB-ID: 5LZS (Shao et al., 2016) was rigid-body fit into both cryo-EM maps. (C, D) Zoom-in of  
 1096 unaccounted cryo-EM density at the interface between the G domain and domain III of eEF1A  
 1097 has been assigned to (C) DB and (D) T4, colored as in (A, B; *left*). Residue A399 (yellow), which  
 1098 confers resistance to ternatin and DB when mutated to valine, is adjacent to the overlapping  
 1099 drug binding pocket. All cryo-EM density is contoured at 2.5  $\sigma$ .

1100

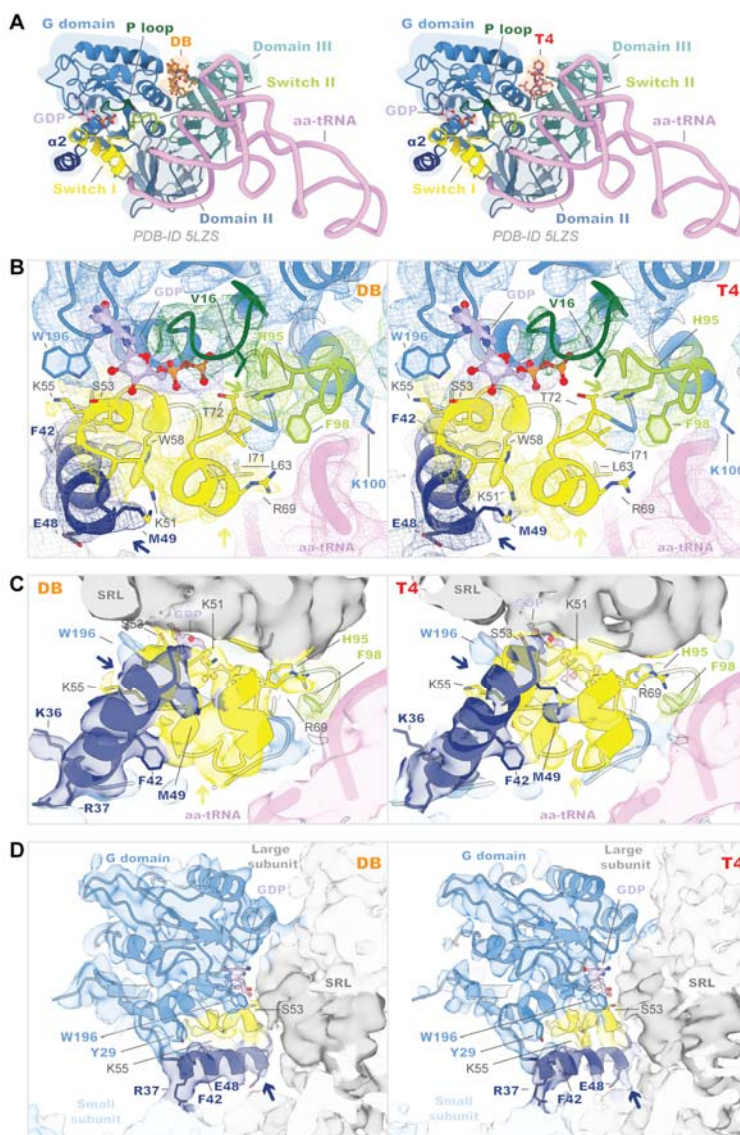

1101  
 1102 **Figure 4—figure supplement 1. The G domain of eEF1A is more dynamic when bound to**  
 1103 **ternatin-4 than to didemnin on the human 80S ribosome. (A)** Overview of the domain  
 1104 architecture of eEF1A ternary complex from PDB-ID: 5LZS (Shao et al., 2016) bound to  
 1105 didemnin (DB; orange; *left*) or ternatin-4 (T4; red; *right*) as viewed from the leading edge of the  
 1106 human 80S ribosome and the Sarcin ricin loop (SRL). G-domain (blue) elements include switch  
 1107 I (yellow), switch II (lime), the P loop (dark green), helix  $\alpha 2$  (dark blue), and a bound GDP (light  
 1108 purple) in the nucleotide binding pocket. pre-accommodated A/T state (aa-tRNA; pink), eEF1A  
 1109 (blue), and ternatin-4 (T4; red). **(B-D)** Molecular models from PDB-ID: 5LZS (Shao et al., 2016)  
 1110 and cryo-EM density shown in (B) mesh and (C, D) surface representation of the eEF1A G  
 1111 domain when stalled with didemnin (DB; orange; *left*) or T4 (*right*) on the elongating rabbit 80S  
 1112 ribosome, colored as in (A). Colored arrows indicate regions of weakened cryo-EM density in  
 1113 the T4-stalled eEF1A G domain in the C terminus of helix  $\alpha 2$  (dark blue), the C terminus of  
 1114 switch I (yellow) and the catalytic His95 of switch II (lime). Panels highlight (B) the nucleotide  
 1115 binding pocket of eEF1A and switch loop architecture, (C) the interface between eEF1A and the  
 1116 SRL (dark gray), and (D) the junction between the SRL, eEF1A helix  $\alpha 2$ , and small subunit  
 1117 (SSU; light blue) rRNA helix 14. All cryo-EM density is contoured at  $2\sigma$ .

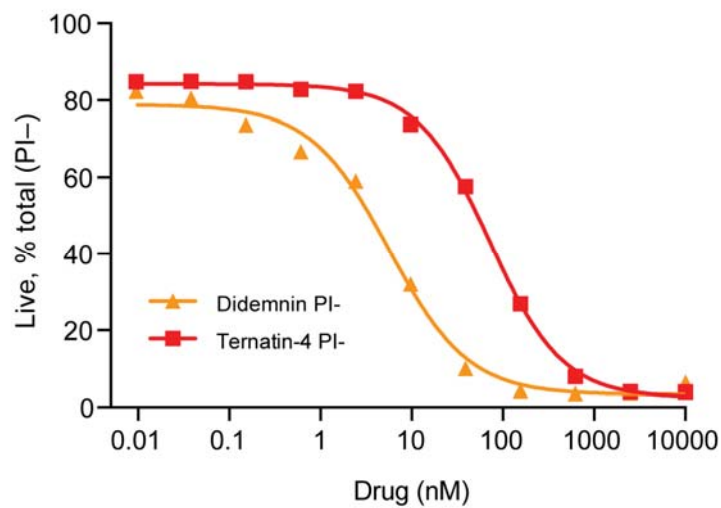

1118  
1119  
1120  
1121  
1122

**Figure 5—figure supplement 1.** Dose response curve for Jurkat cells treated for 24 hours with the indicated compound. Cells were stained with propidium iodide (PI-) and analyzed for cell death by flow cytometry.

1123 **Table S1.** Apparent transition rates  $k_{i \rightarrow j}$  between FRET states (low FRET: index 1, intermediate  
 1124 FRET: index 2, high FRET: index 3) and overall decay rates  $k_i$  for each state observed in aa-  
 1125 tRNA selection experiments prior to the first dwell in high FRET (AC) for  $\geq 150$  ms with standard  
 1126 errors from 1000 bootstrap samples.  
 1127

| <b>Control</b>                                         |                                                         |                                                          |
|--------------------------------------------------------|---------------------------------------------------------|----------------------------------------------------------|
| $k_1 = (1.90 \pm 0.13) \text{ s}^{-1}$                 | $k_{1 \rightarrow 2} = (1.89 \pm 0.13) \text{ s}^{-1}$  | $k_{1 \rightarrow 3} = (0.01 \pm 0.005) \text{ s}^{-1}$  |
| $k_{2 \rightarrow 1} = (0.99 \pm 0.01) \text{ s}^{-1}$ | $k_2 = (1.73 \pm 0.09) \text{ s}^{-1}$                  | $k_{2 \rightarrow 3} = (0.74 \pm 0.06) \text{ s}^{-1}$   |
| $k_{3 \rightarrow 1} = (0.24 \pm 0.09) \text{ s}^{-1}$ | $k_{3 \rightarrow 2} = (15.21 \pm 0.44) \text{ s}^{-1}$ | $k_3 = (15.45 \pm 0.43) \text{ s}^{-1}$                  |
| <b>Didemnin</b>                                        |                                                         |                                                          |
| $k_1 = (2.827 \pm 0.18) \text{ s}^{-1}$                | $k_{1 \rightarrow 2} = (2.824 \pm 0.18) \text{ s}^{-1}$ | $k_{1 \rightarrow 3} = (0.003 \pm 0.003) \text{ s}^{-1}$ |
| $k_{2 \rightarrow 1} = (0.64 \pm 0.03) \text{ s}^{-1}$ | $k_2 = (0.71 \pm 0.03) \text{ s}^{-1}$                  | $k_{2 \rightarrow 3} = (0.07 \pm 0.01) \text{ s}^{-1}$   |
| $k_{3 \rightarrow 1} = (0.22 \pm 0.17) \text{ s}^{-1}$ | $k_{3 \rightarrow 2} = (19.1 \pm 1.1) \text{ s}^{-1}$   | $k_3 = (19.3 \pm 1.1) \text{ s}^{-1}$                    |
| <b>Ternatin-4</b>                                      |                                                         |                                                          |
| $k_1 = (2.36 \pm 0.15) \text{ s}^{-1}$                 | $k_{1 \rightarrow 2} = (2.35 \pm 0.16) \text{ s}^{-1}$  | $k_{1 \rightarrow 3} = (0.01 \pm 0.01) \text{ s}^{-1}$   |
| $k_{2 \rightarrow 1} = (0.71 \pm 0.04) \text{ s}^{-1}$ | $k_2 = (0.85 \pm 0.04) \text{ s}^{-1}$                  | $k_{2 \rightarrow 3} = (0.14 \pm 0.02) \text{ s}^{-1}$   |
| $k_{3 \rightarrow 1} = (0.52 \pm 0.42) \text{ s}^{-1}$ | $k_{3 \rightarrow 2} = (17.45 \pm 0.81) \text{ s}^{-1}$ | $k_3 = (17.97 \pm 0.83) \text{ s}^{-1}$                  |

1128  
 1129  
 1130  
 1131  
 1132  
 1133  
 1134  
 1135  
 1136  
 1137  
 1138  
 1139  
 1140  
 1141  
 1142  
 1143  
 1144  
 1145  
 1146  
 1147  
 1148  
 1149  
 1150  
 1151

1152 **Table S2.** Data collection and processing statistics.

|                                                 | <b>RRL 80S•aa-tRNA•<br/>eEF1A•ternatin-4<br/>EMDB-27732</b> | <b>Human 80S•aa-tRNA•<br/>eEF1A•didemnin<br/>EMDB-27691</b> | <b>Human 80S•aa-tRNA•<br/>eEF1A•ternatin-4<br/>EMDB-27694</b> |
|-------------------------------------------------|-------------------------------------------------------------|-------------------------------------------------------------|---------------------------------------------------------------|
| <b>Grid Preparation</b>                         |                                                             |                                                             |                                                               |
| Grids                                           | Quantifoil R2/2 grids<br>+ 5 nm carbon                      | UltrAuFoil Gold R1.2/1.3                                    | UltrAuFoil Gold R1.2/1.3                                      |
| [Drug] (μM)                                     | 1                                                           | 0.2                                                         | 20                                                            |
| [80S] (nM)                                      | ~120                                                        | ~200                                                        | ~200                                                          |
| Plunge freezer                                  | Vitrobot MKIII (FEI)                                        | Vitrobot MKII (FEI)                                         | Vitrobot MKII (FEI)                                           |
| Temperature (°C)                                | 4                                                           | 4                                                           | 4                                                             |
| Humidity (%)                                    | 100                                                         | 100                                                         | 100                                                           |
| Wait time (s)                                   | 30                                                          | 45                                                          | 45                                                            |
| Blot time (s)                                   | 3                                                           | 2-3                                                         | 2-3                                                           |
| <b>Data Collection</b>                          |                                                             |                                                             |                                                               |
| Microscope                                      | Titan Krios (FEI)                                           | Titan Krios (FEI)                                           | Titan Krios (FEI)                                             |
| Voltage (kV)                                    | 300                                                         | 300                                                         | 300                                                           |
| Camera                                          | Falcon II (FEI)                                             | K2 Summit (Gatan)                                           | K2 Summit (Gatan)                                             |
| Acquisition software                            | EPU (FEI)                                                   | Leginon MSI                                                 | Leginon MSI                                                   |
| Acquisition mode                                | Counting                                                    | Counting                                                    | Super Resolution                                              |
| Magnification (×)                               | 135,000                                                     | 105,000                                                     | 105,000                                                       |
| Pixel size (Å)                                  | 1.040                                                       | 1.073                                                       | 0.548 (1.096)                                                 |
| Calibrated pixel size (Å)                       | 1.045                                                       | 1.067                                                       | 1.085                                                         |
| Defocus range (μm)                              | 0.8 - 9.2                                                   | 0.8 - 3.2                                                   | 0.8 - 2.5                                                     |
| Frames/movie                                    | 40                                                          | 50                                                          | 50                                                            |
| Exposure time (s)                               | 1                                                           | 10                                                          | 10                                                            |
| Dose rate (e <sup>-</sup> /Å <sup>2</sup> /s)   | 40                                                          | 6.72                                                        | 6.53-7.00                                                     |
| Frame rate (s/frame)                            | 0.06                                                        | 0.2                                                         | 0.2                                                           |
| Electron dose (e <sup>-</sup> /Å <sup>2</sup> ) | 40.00                                                       | 67.19                                                       | 65.31-70.00                                                   |
| <b>Data Processing</b>                          |                                                             |                                                             |                                                               |
| Useable micrographs                             | 1,422                                                       | 3,574                                                       | 9,401                                                         |
| Particles picked/sorted                         | 159,068                                                     | 301,208                                                     | 934,291                                                       |
| Particles after 2D                              | 120,986                                                     | 289,345                                                     | 816,898                                                       |
| Particles after 3D                              | 85,795                                                      | 180,555                                                     | 393,664                                                       |
| Final particles                                 | 22,034                                                      | 35,193                                                      | 34,369                                                        |
| Sharpening B-factor (Å <sup>2</sup> )           | -110.3                                                      | -20                                                         | -20                                                           |
| Resolution (Å)                                  | 4.1                                                         | 3.6                                                         | 3.2                                                           |

1153
